# Supplementary material for: An angiogenesis-associated gene-based signature predicting prognosis and immunotherapy efficacy of head and neck squamous cell carcinoma patients
Source: PubMed Central journal article supplement (PMC10861726; doi:10.1007/s00432-024-05606-8), 2024-02-12

# APOH

## Normal Tissue

## Tumor Tissue

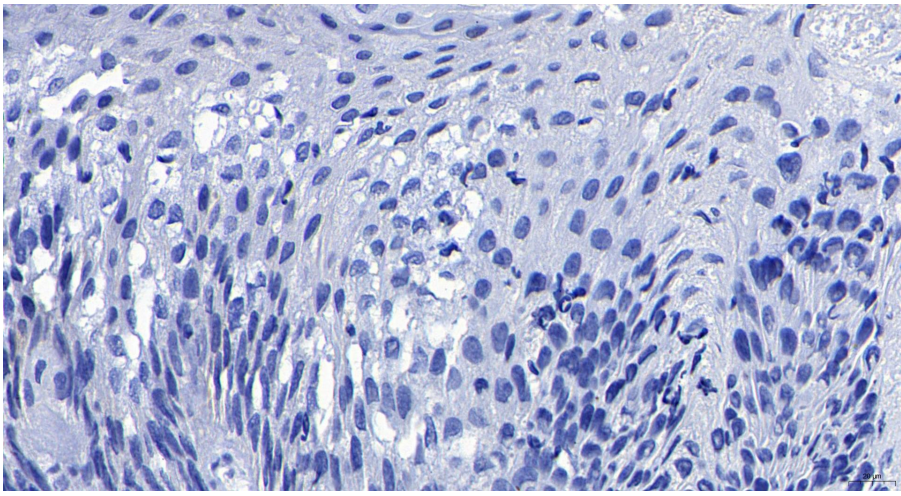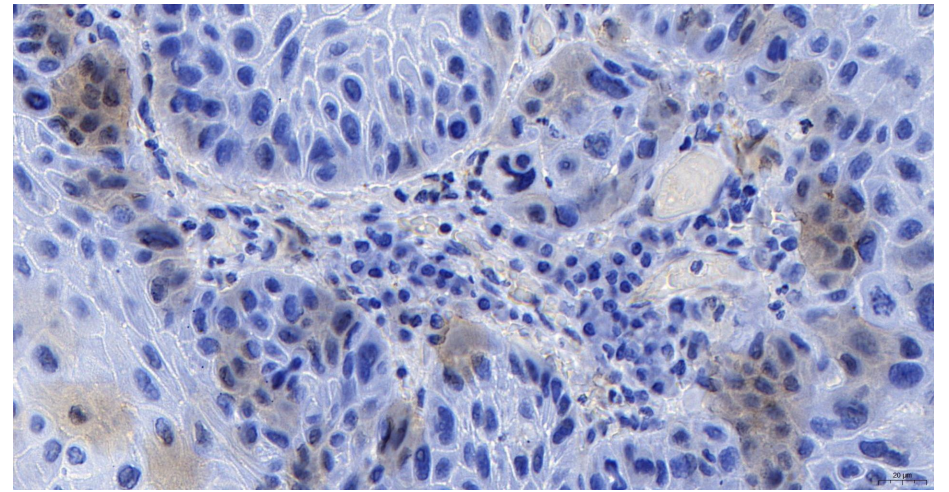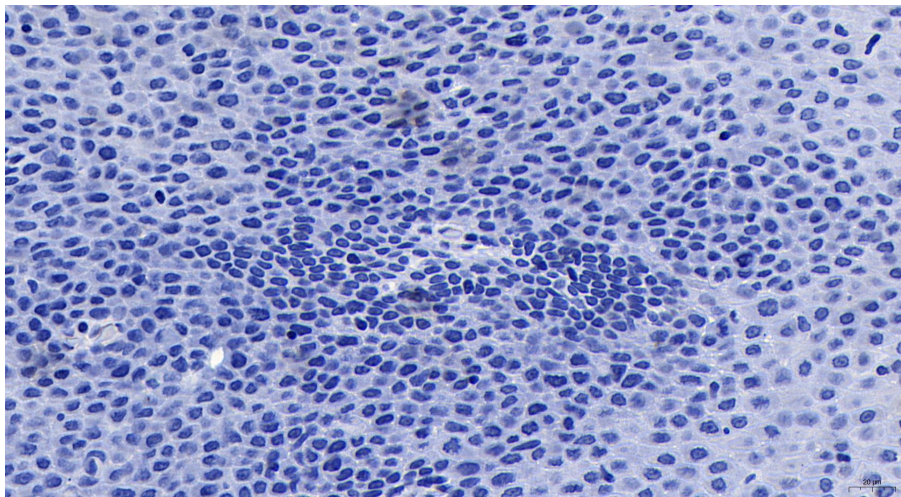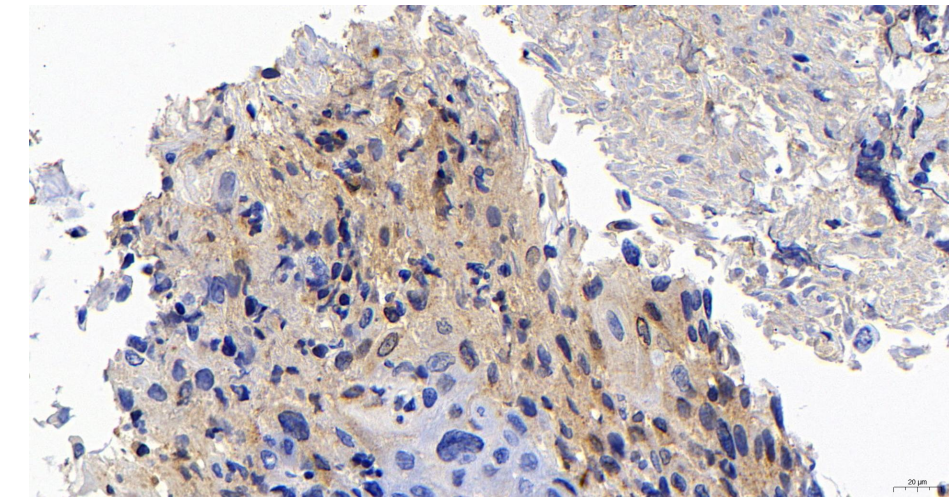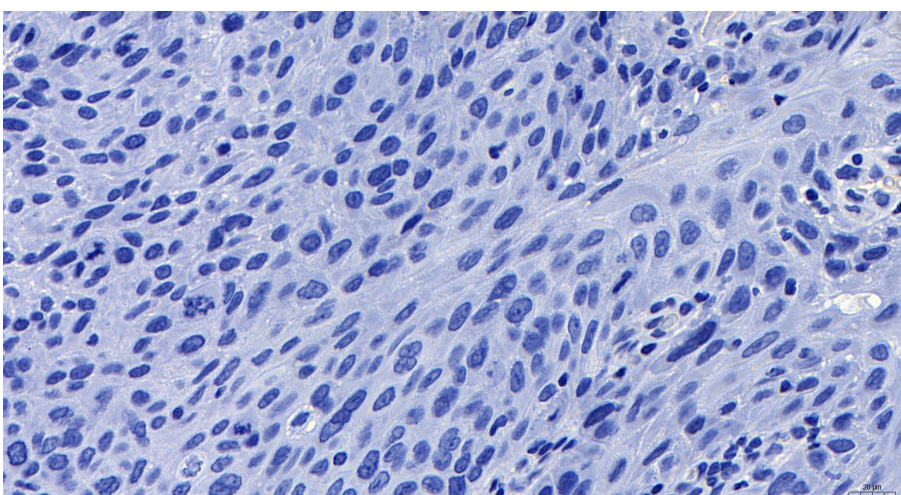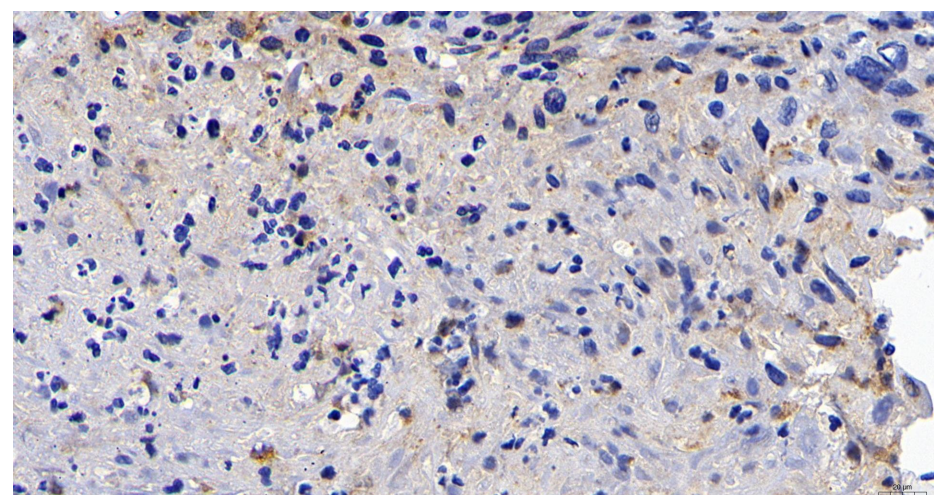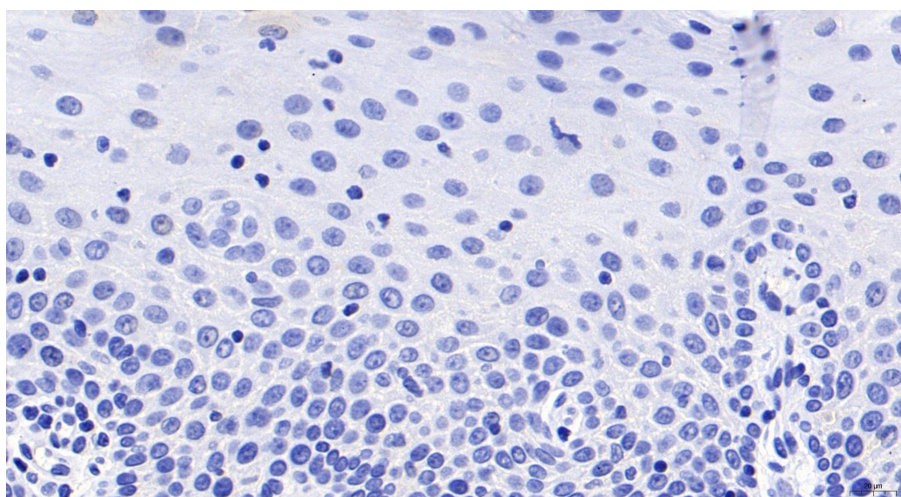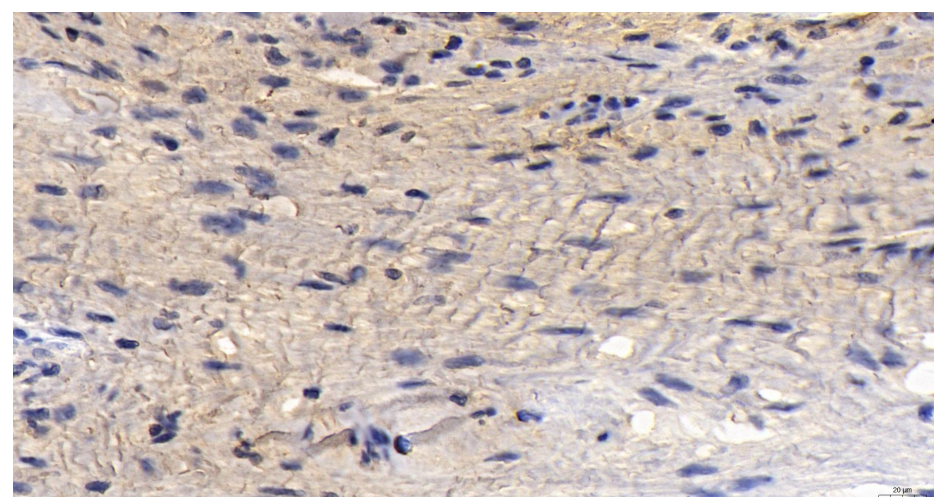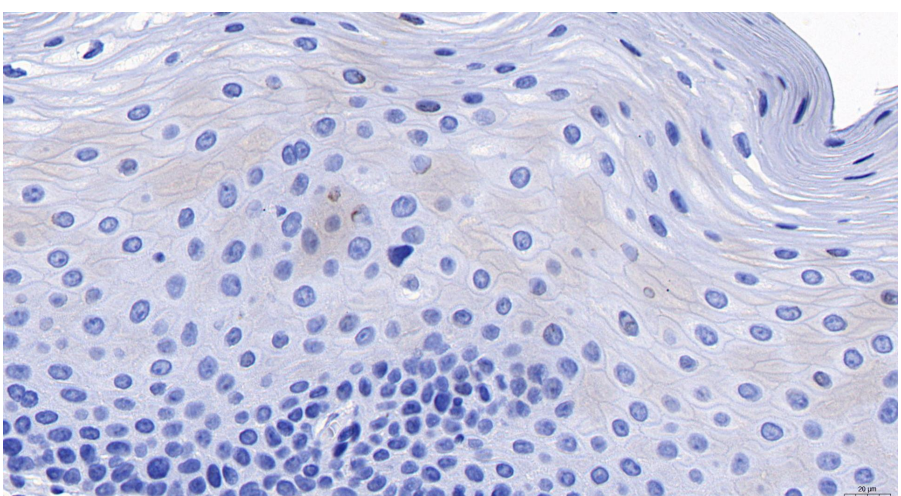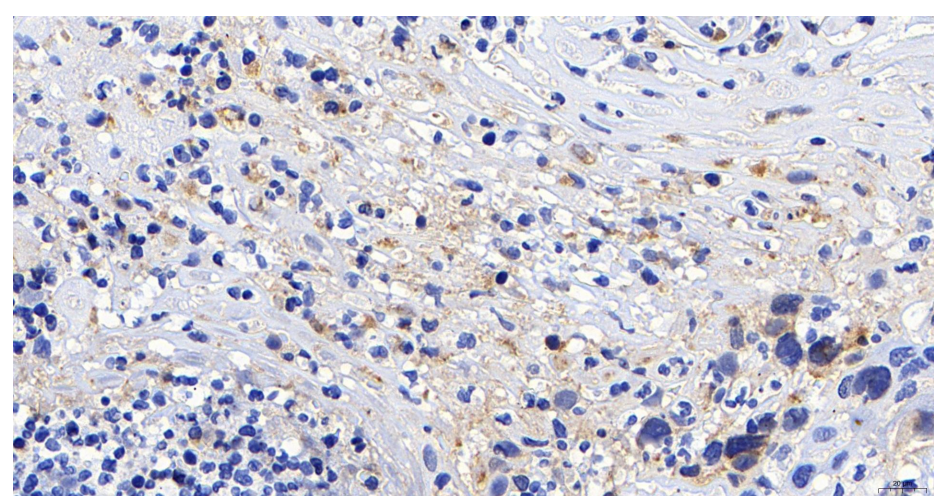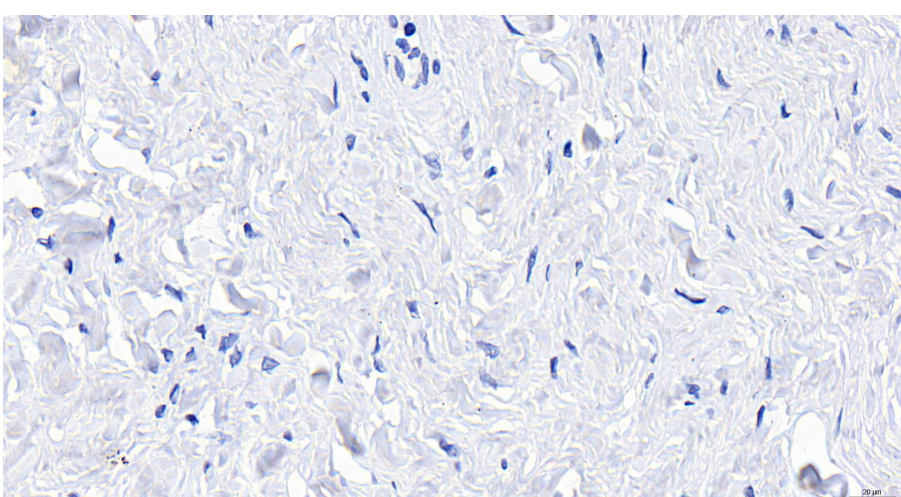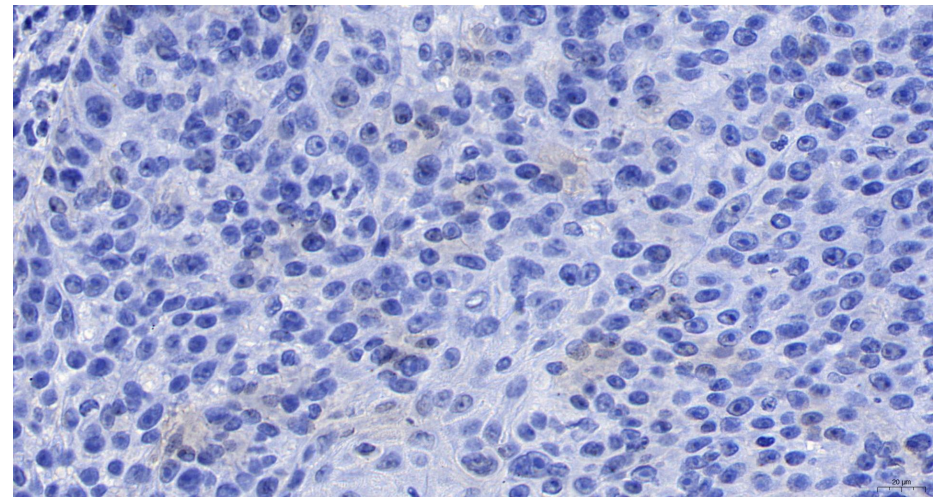

# MSX1

## Normal Tissue

## Tumor Tissue

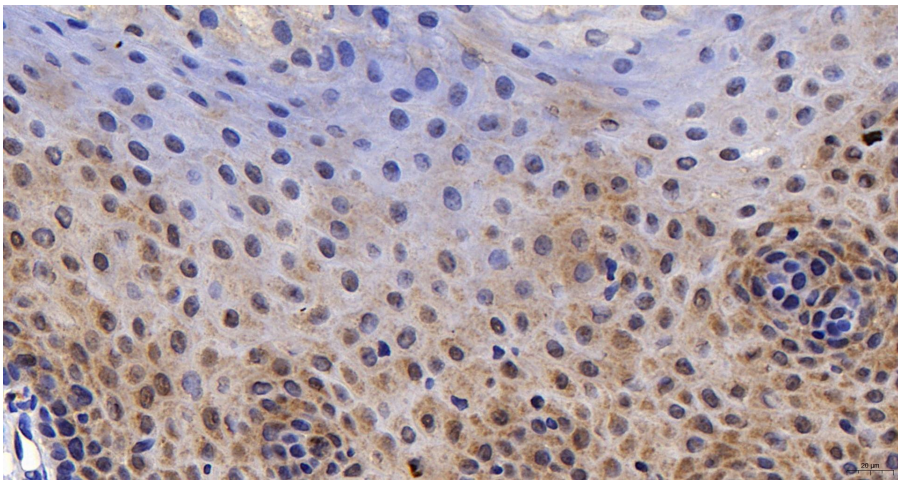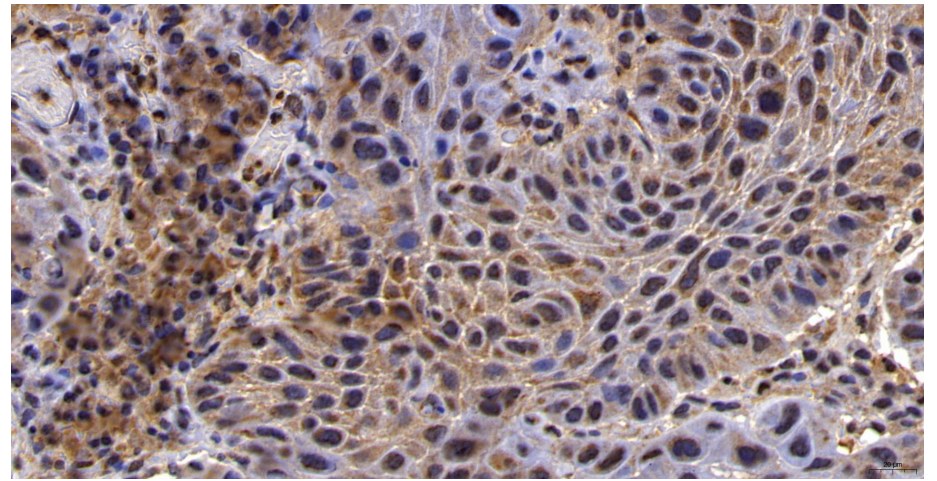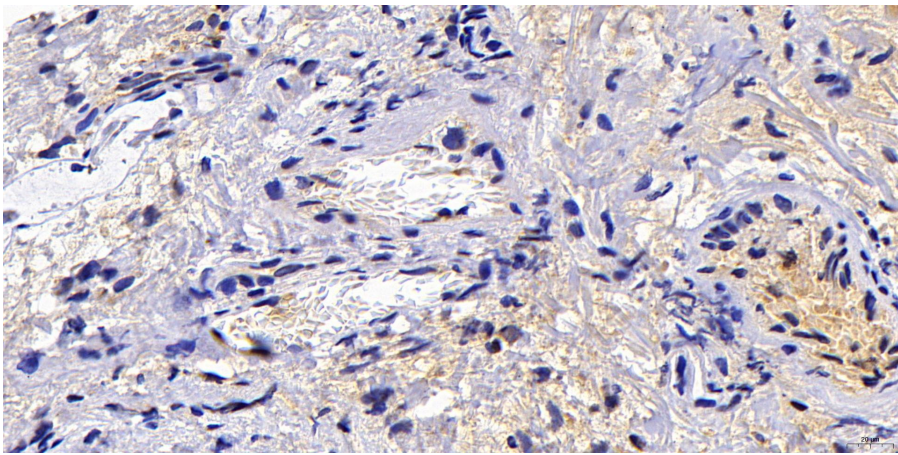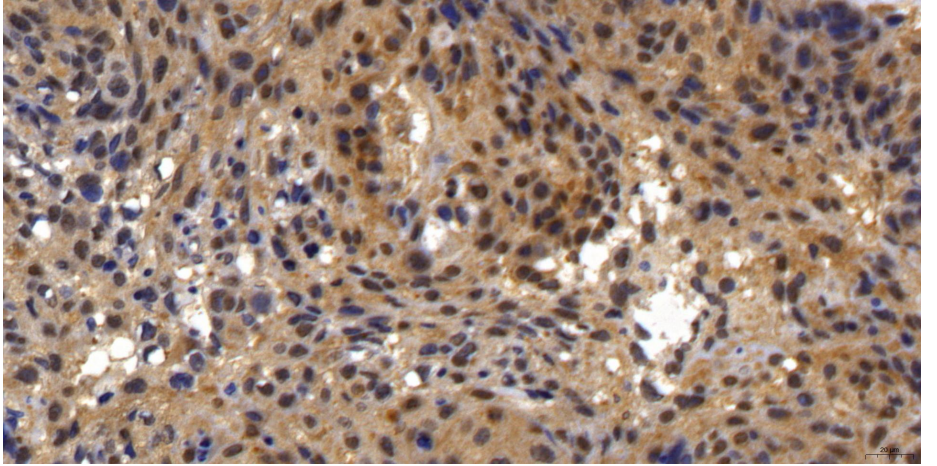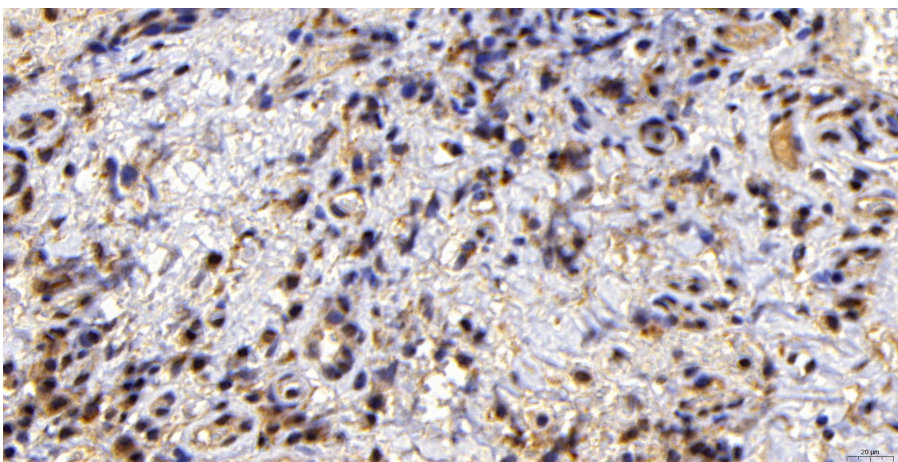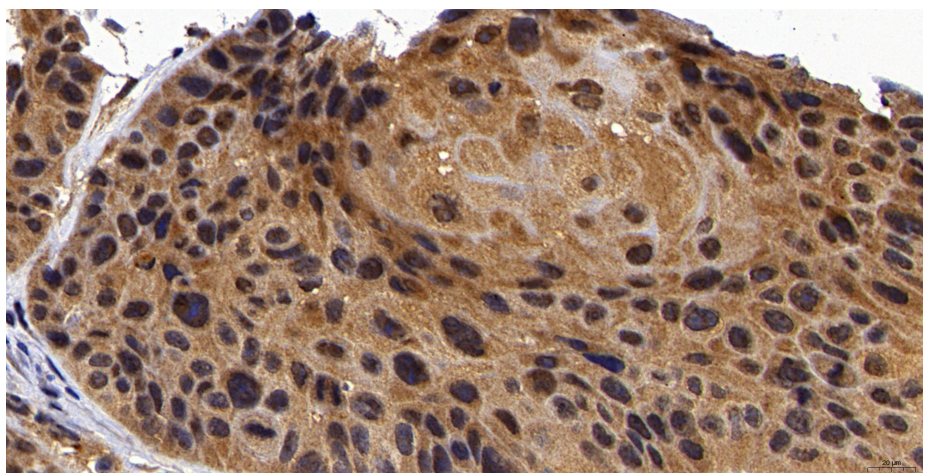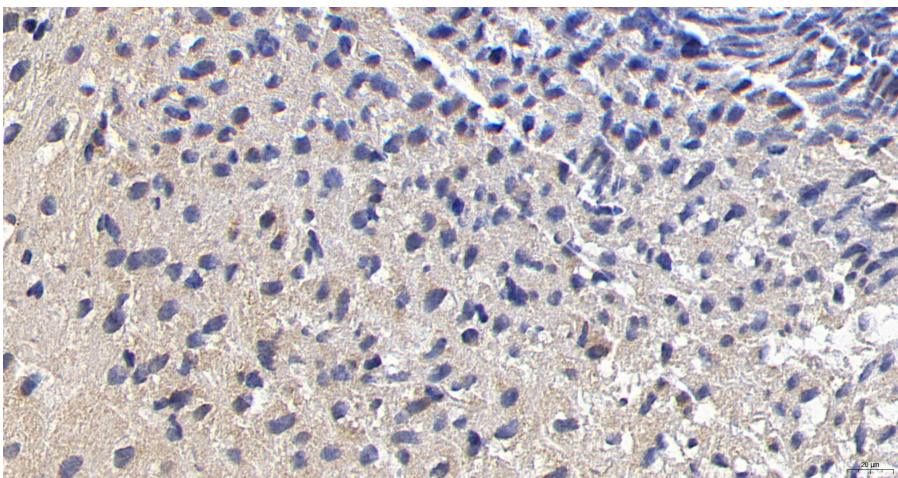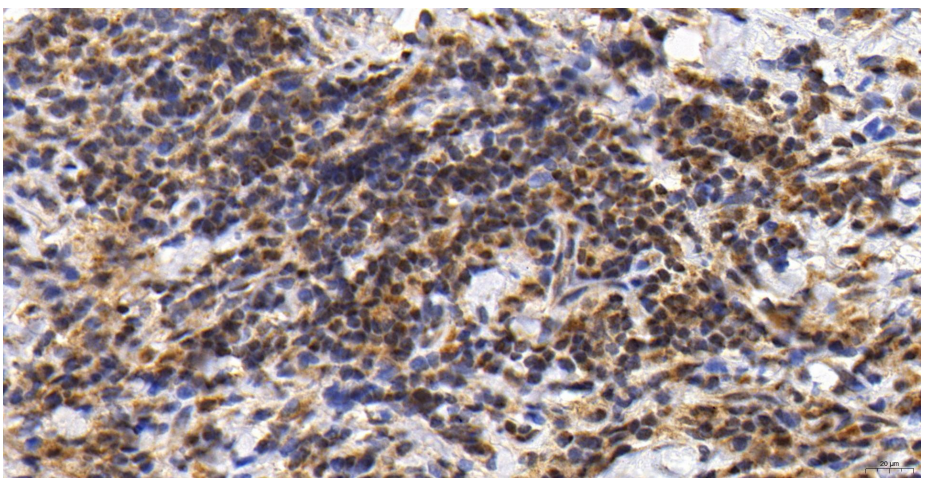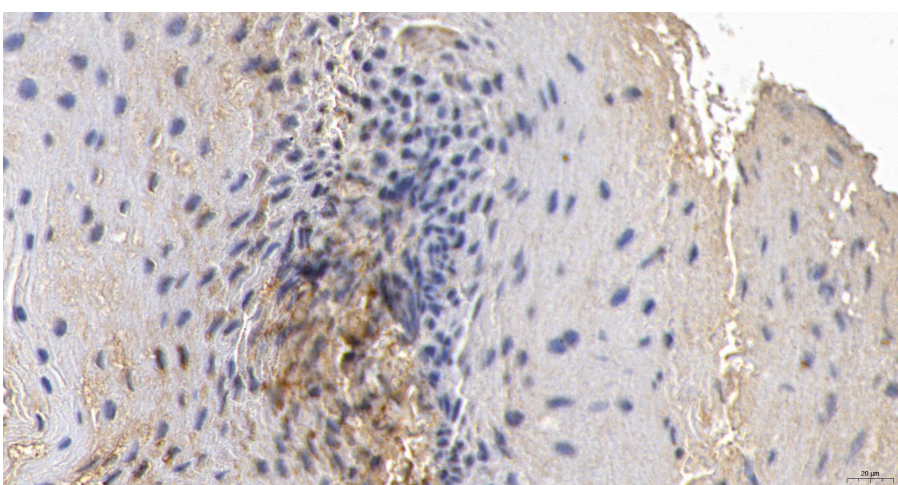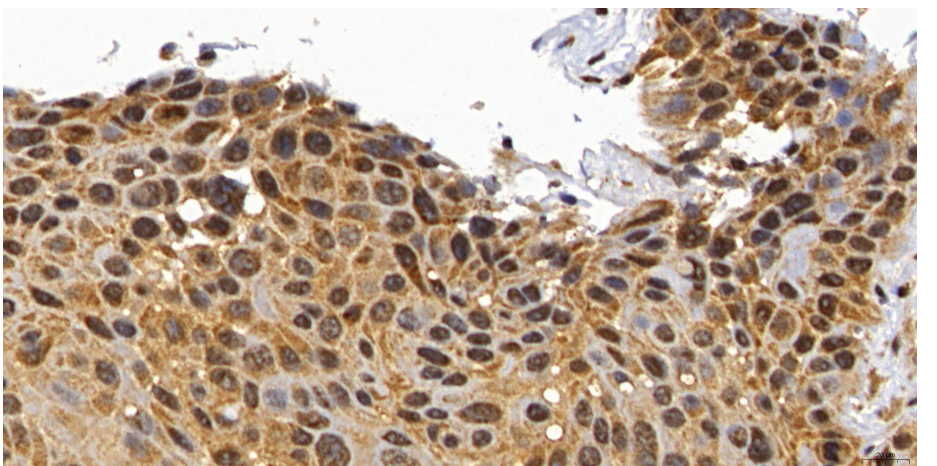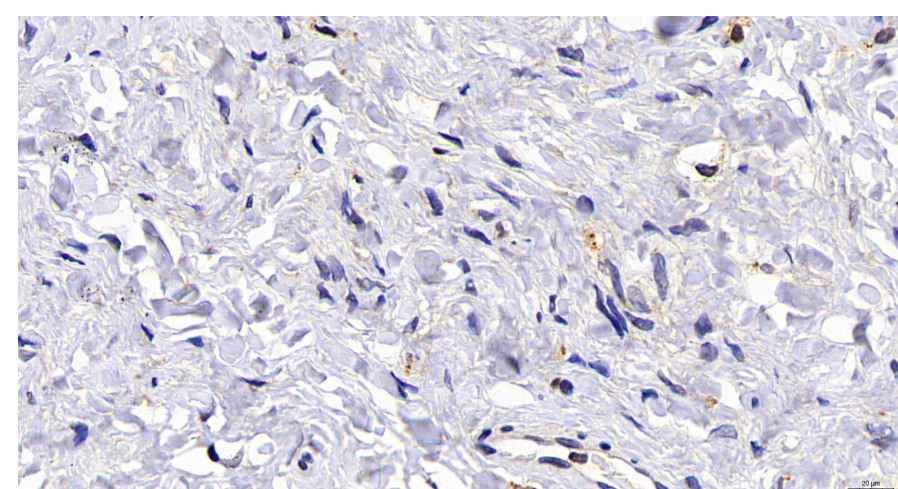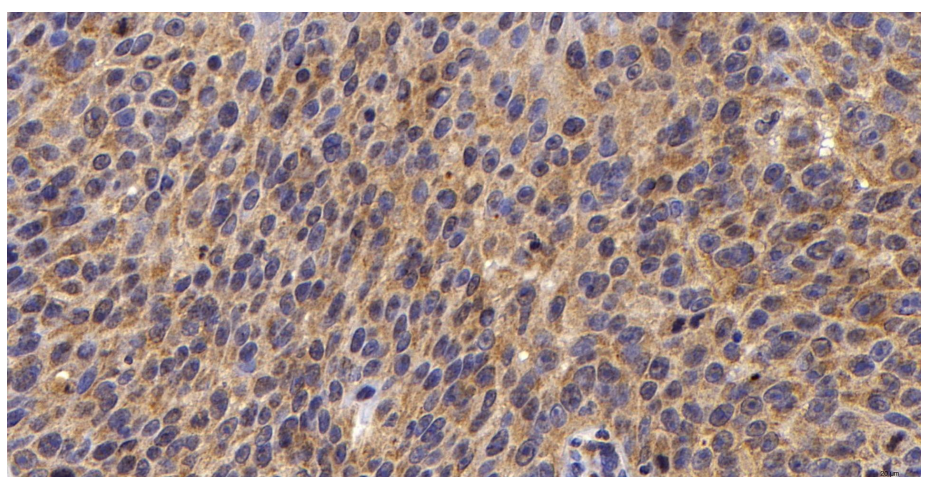

# OLR1

## Normal Tissue

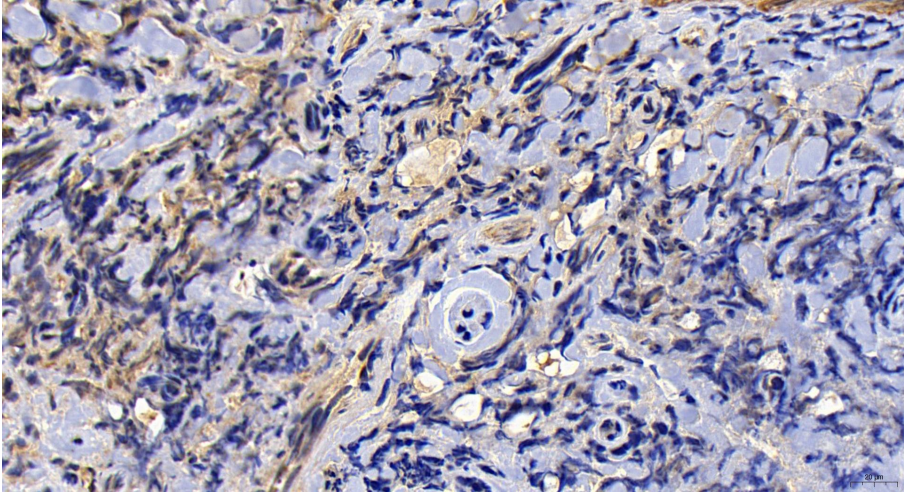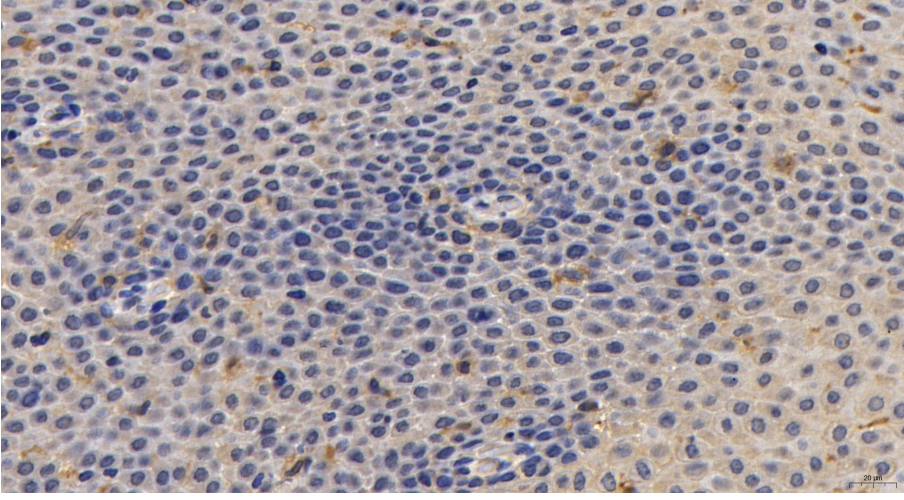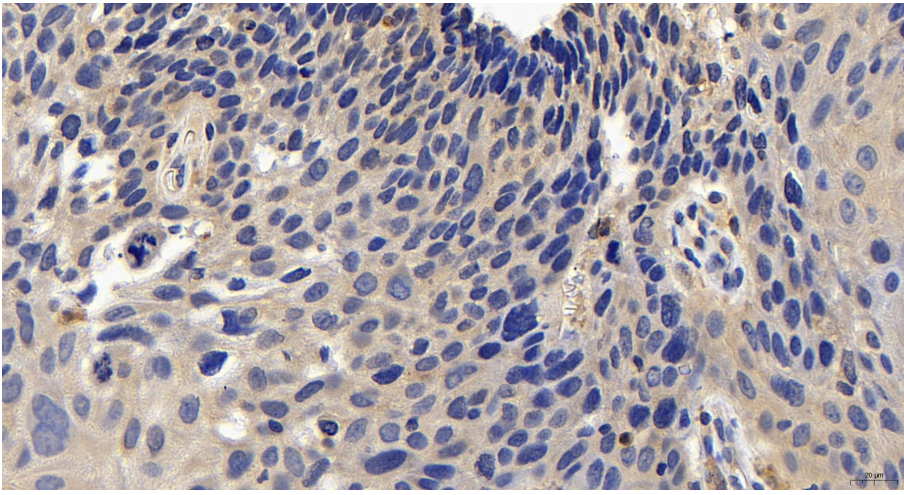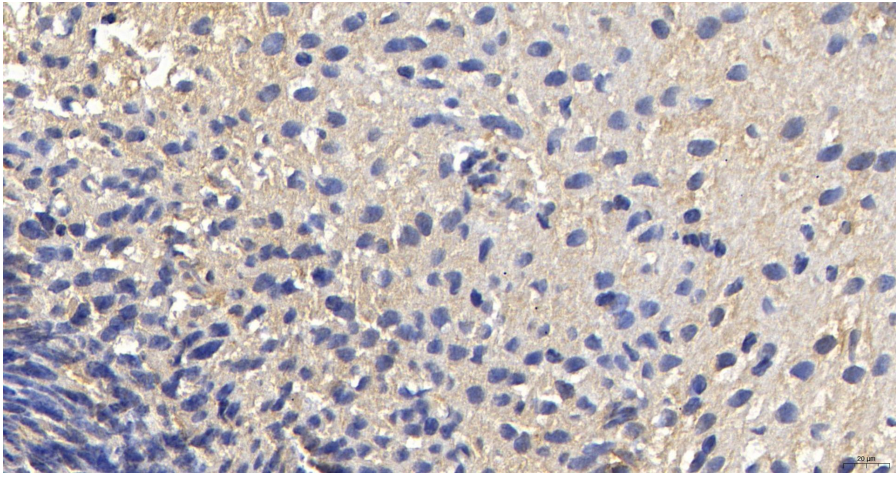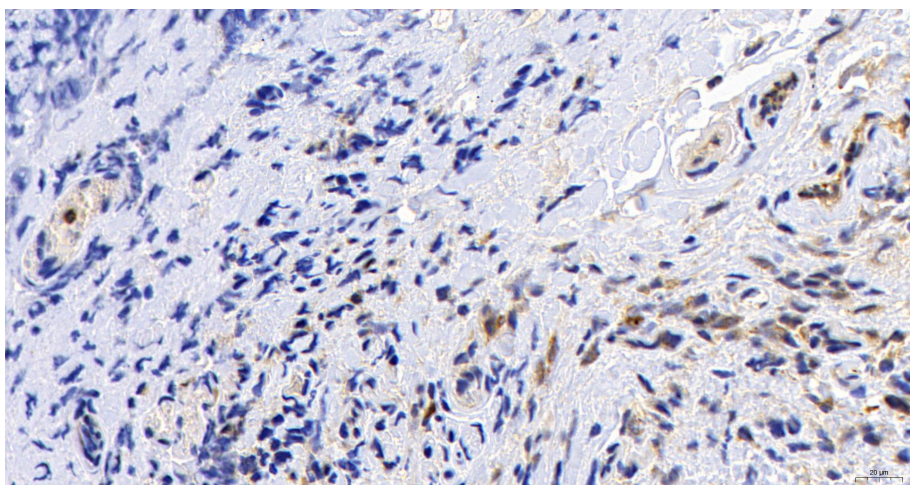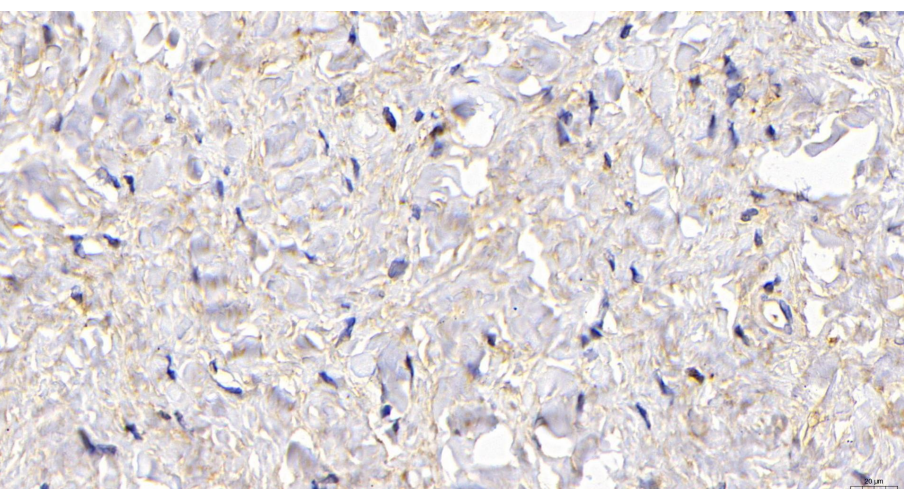

## Tumor Tissue

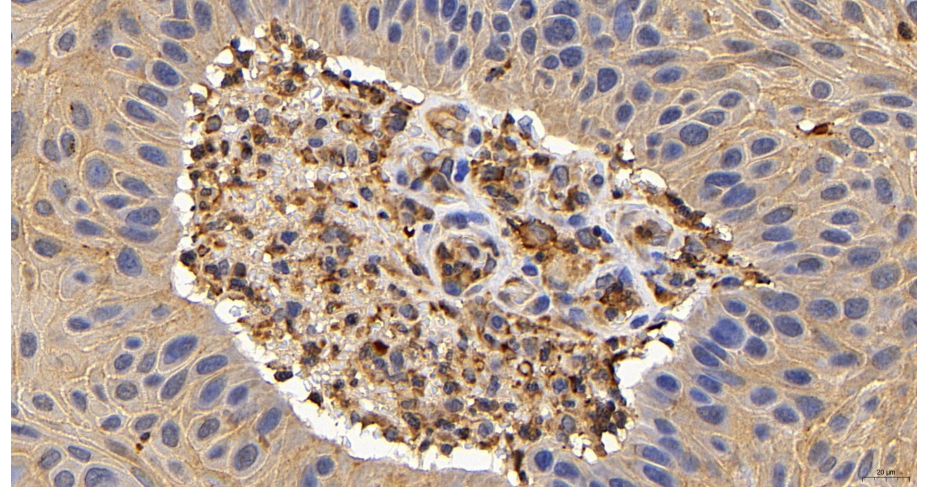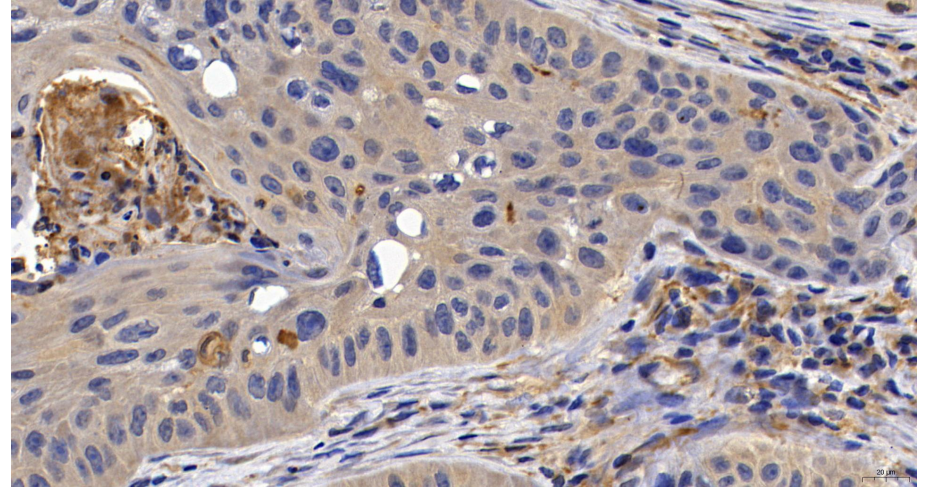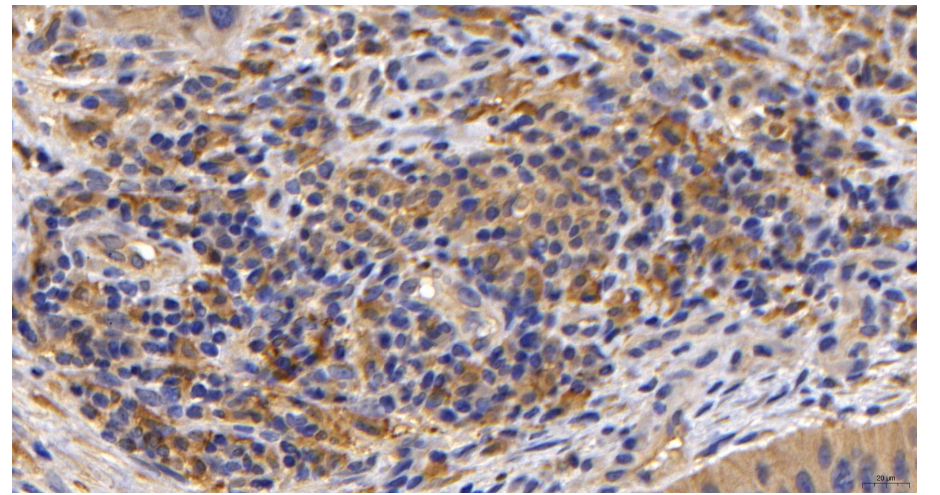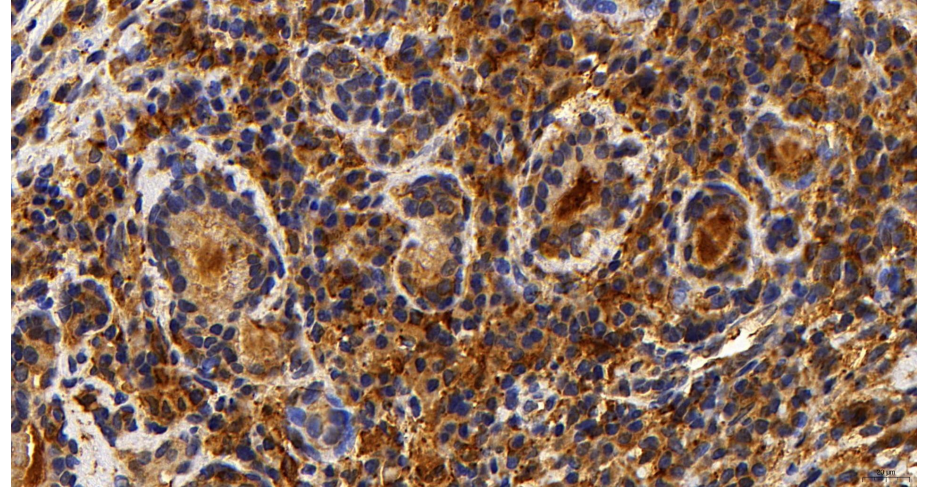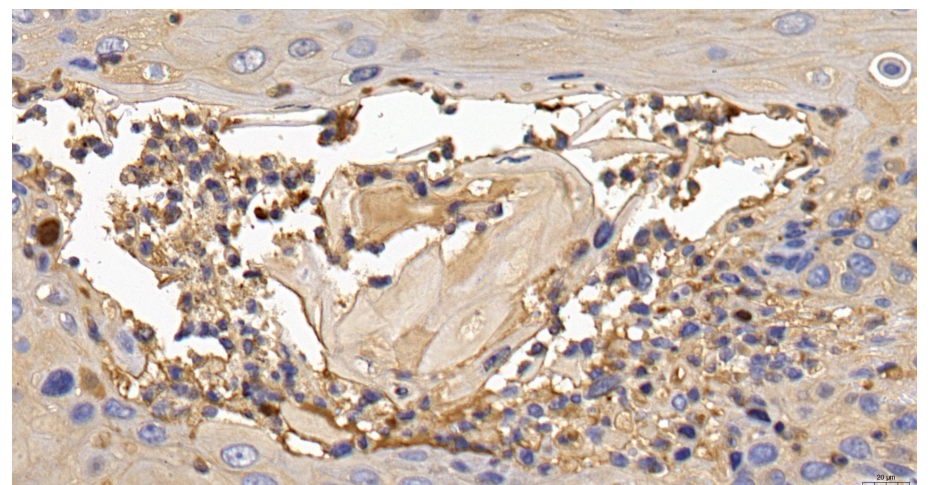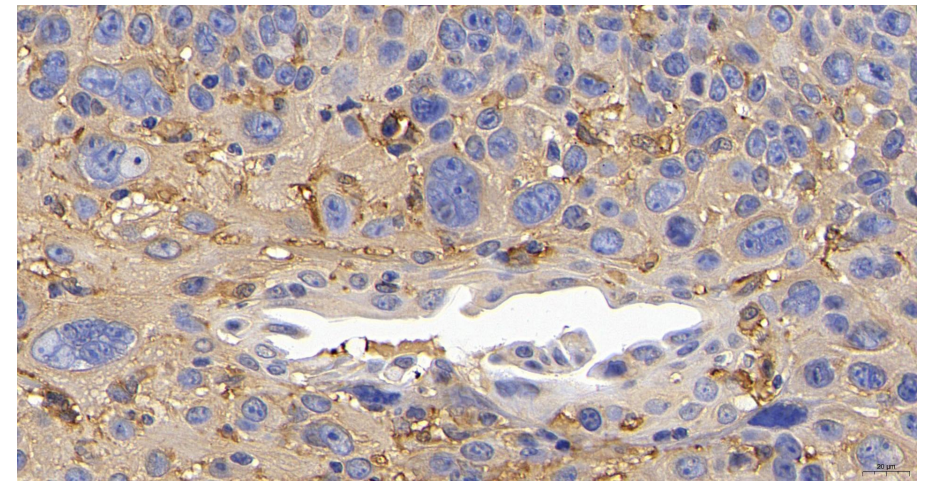

# PDGFA

## Normal Tissue

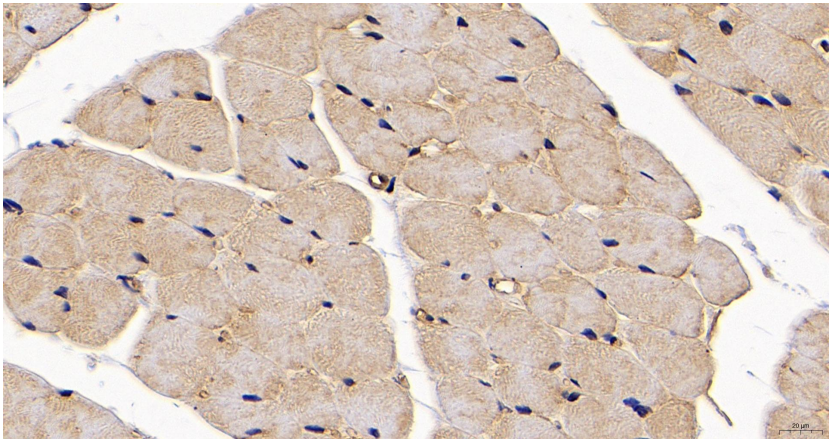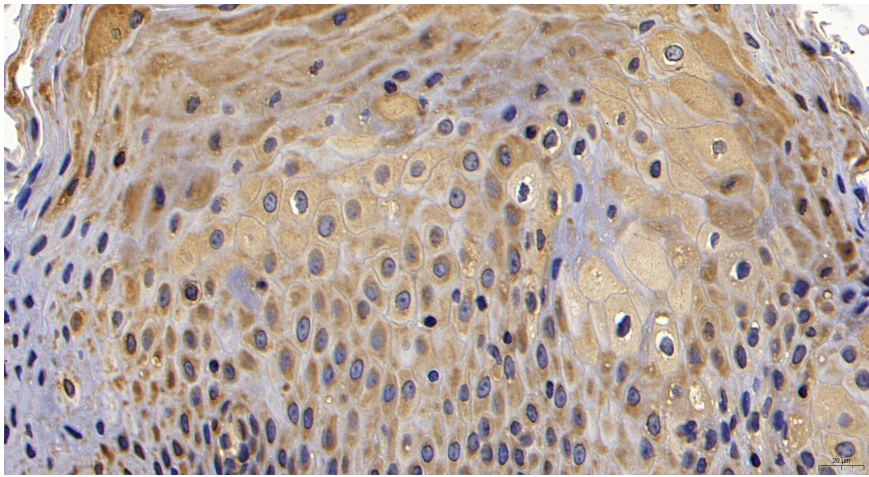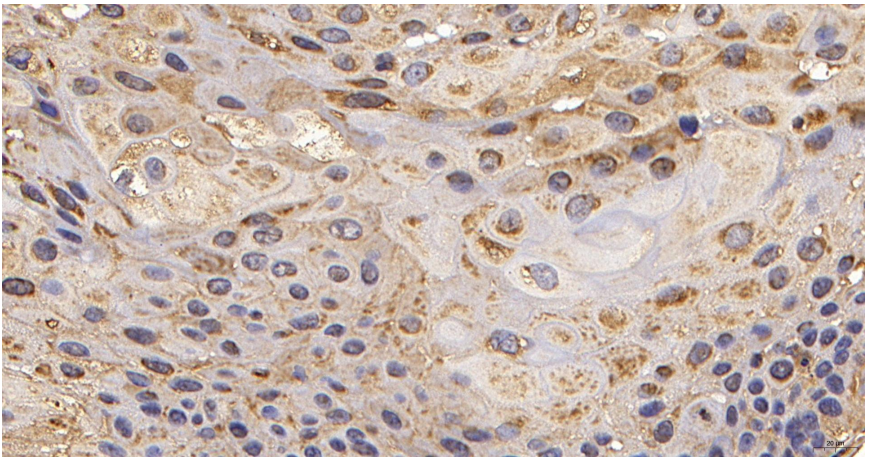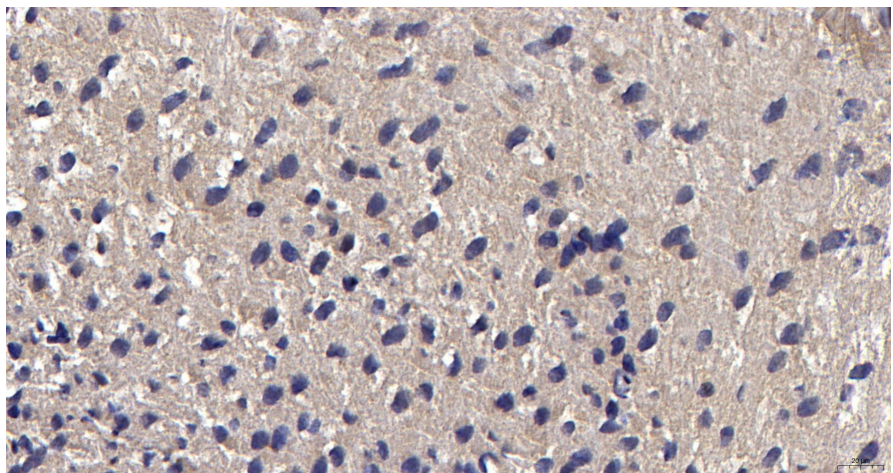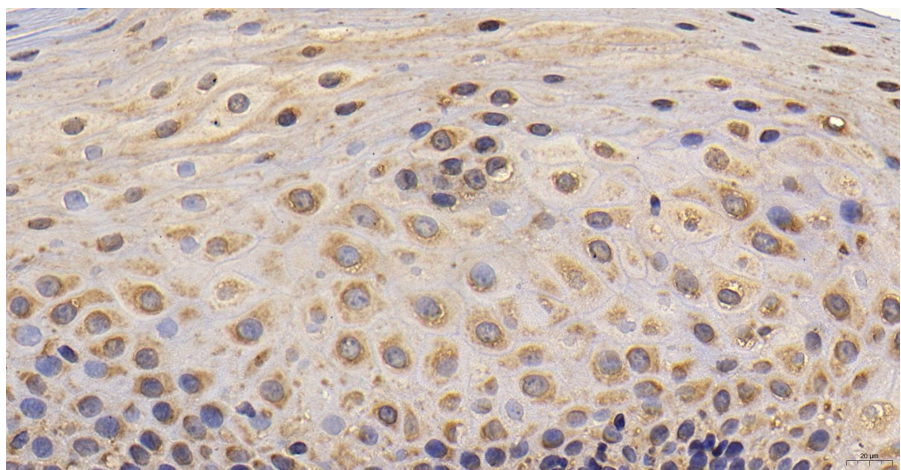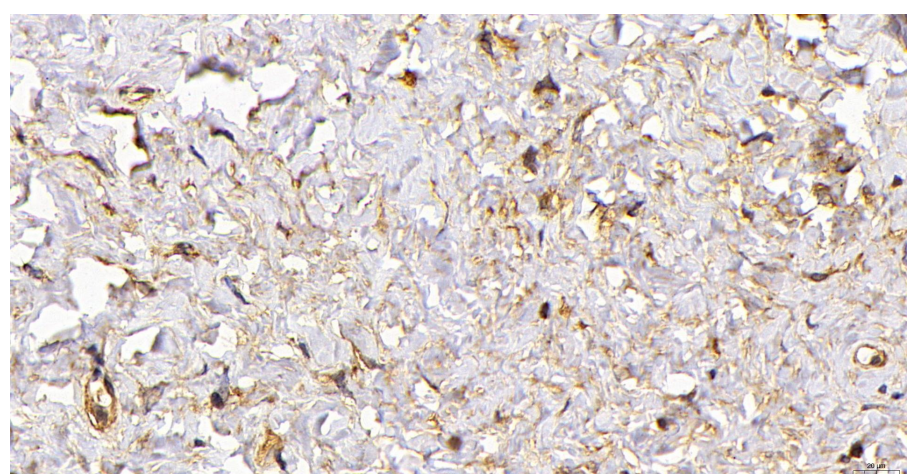

## Tumor Tissue

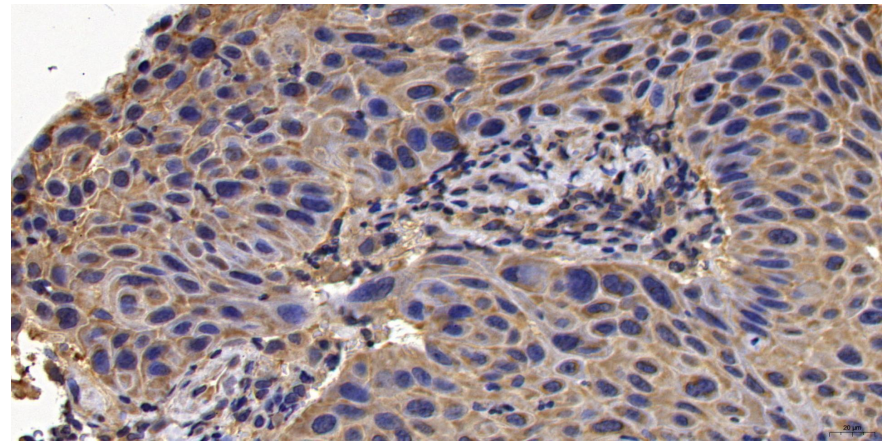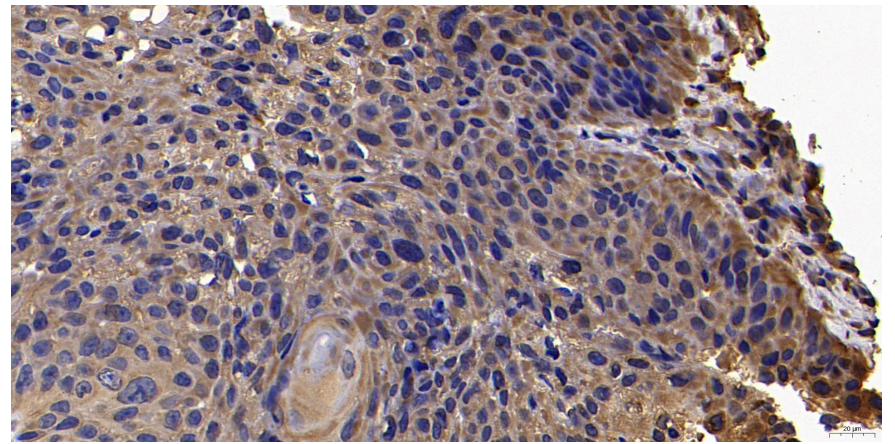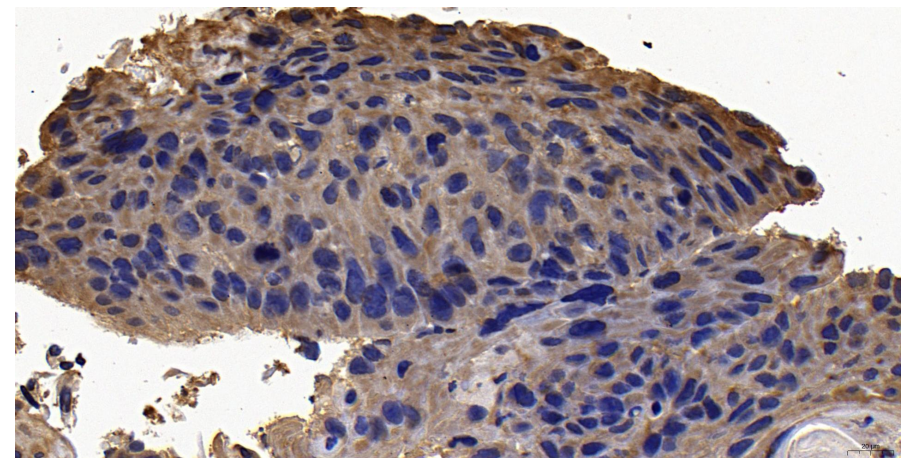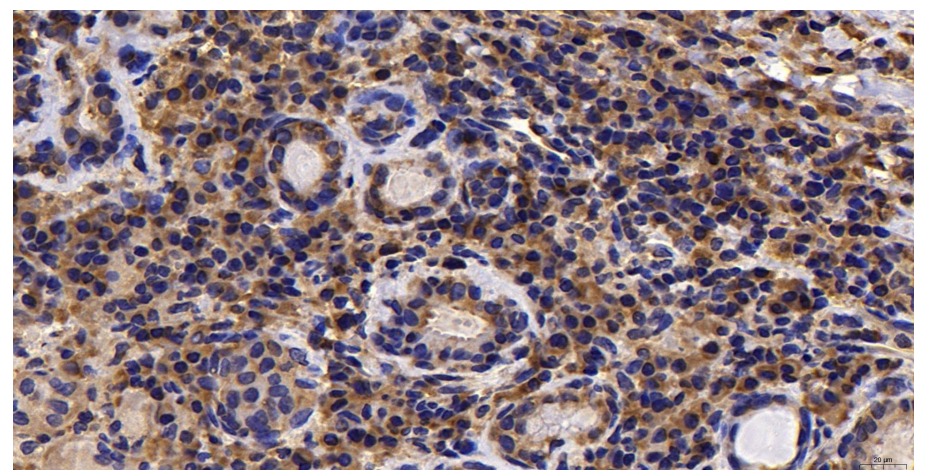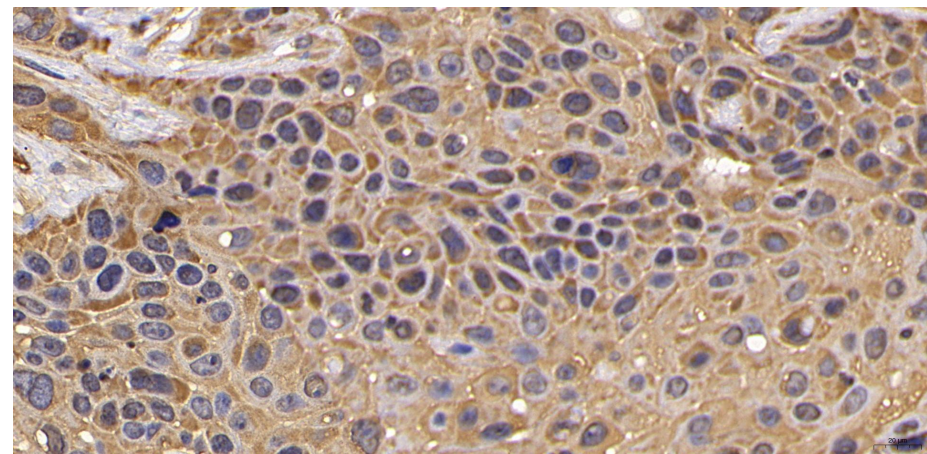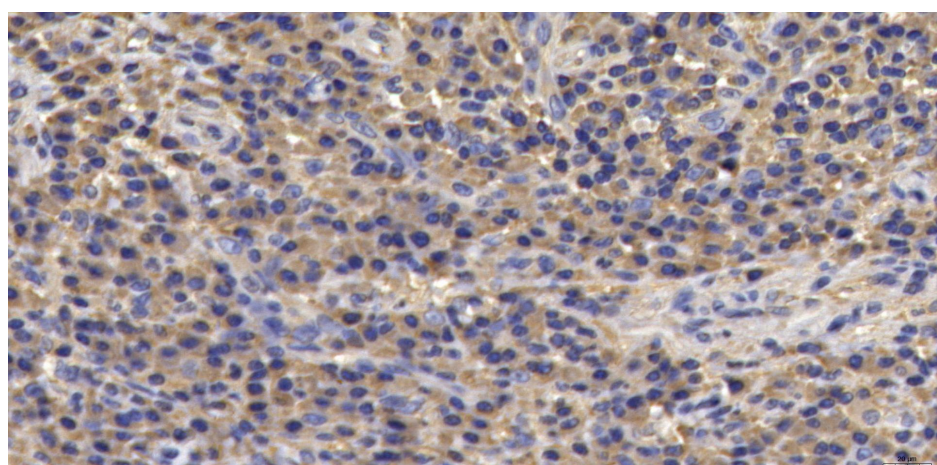

# S100A4

## Normal Tissue

## Tumor Tissue

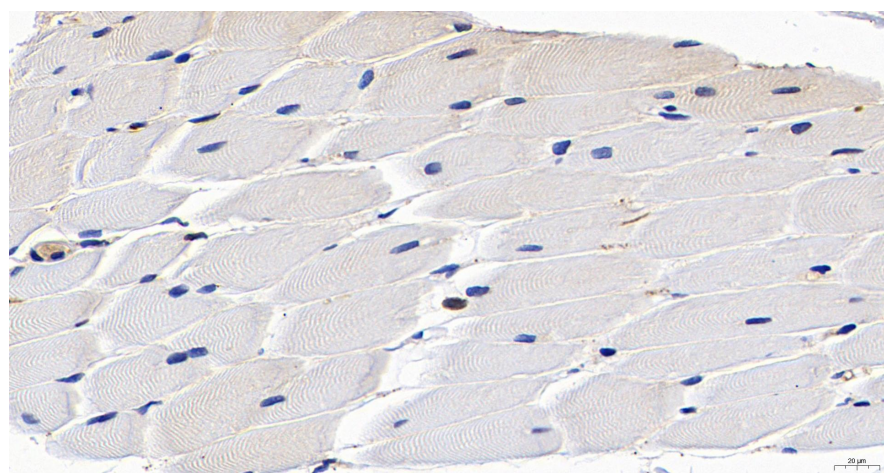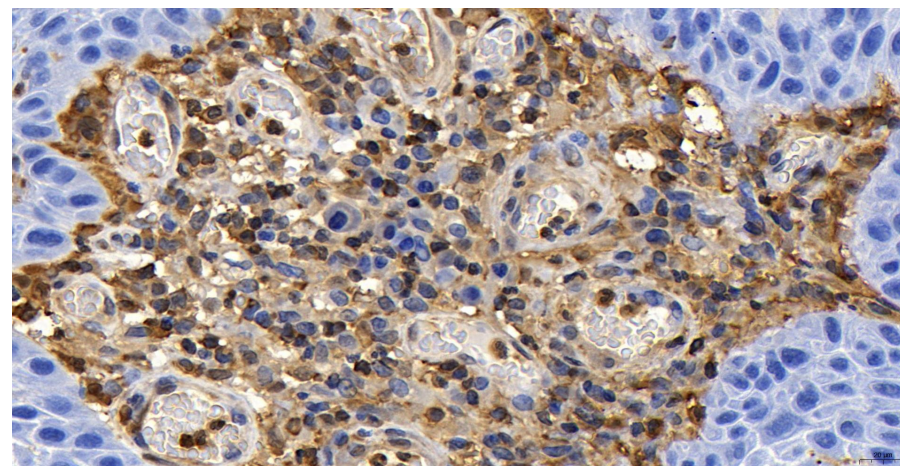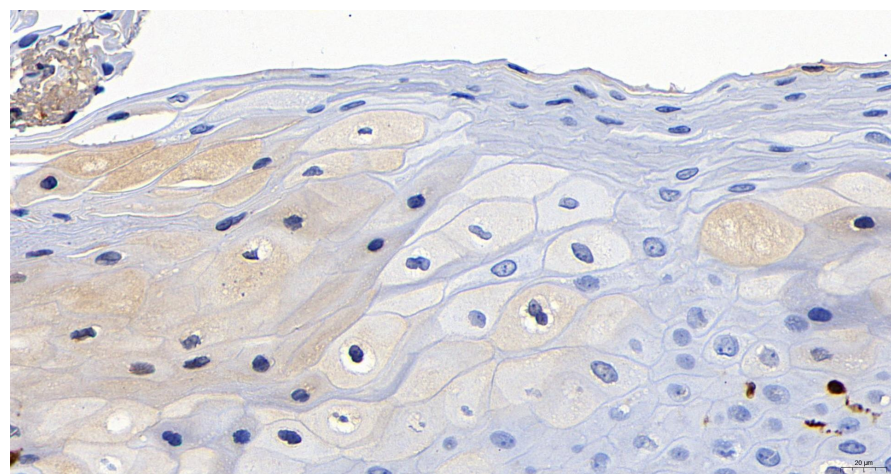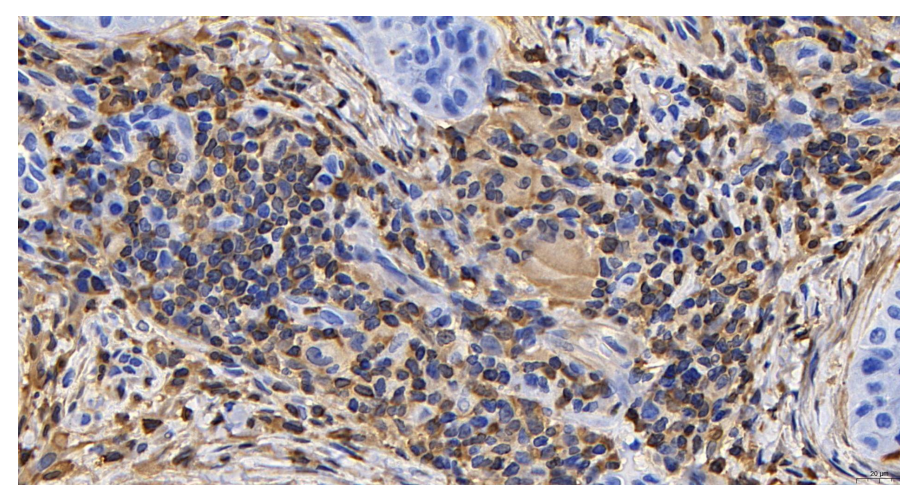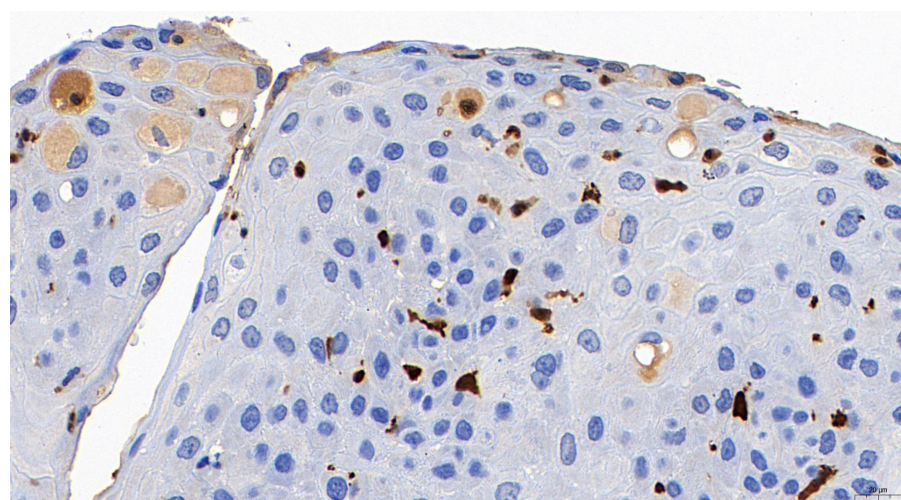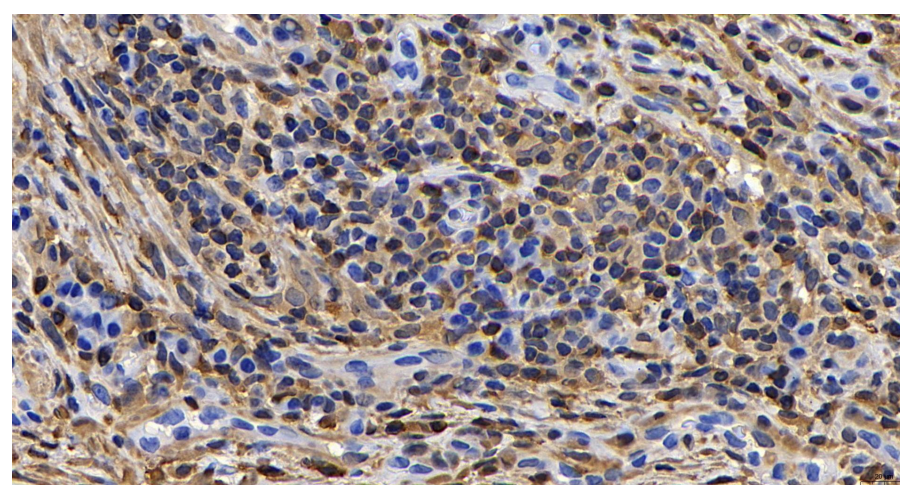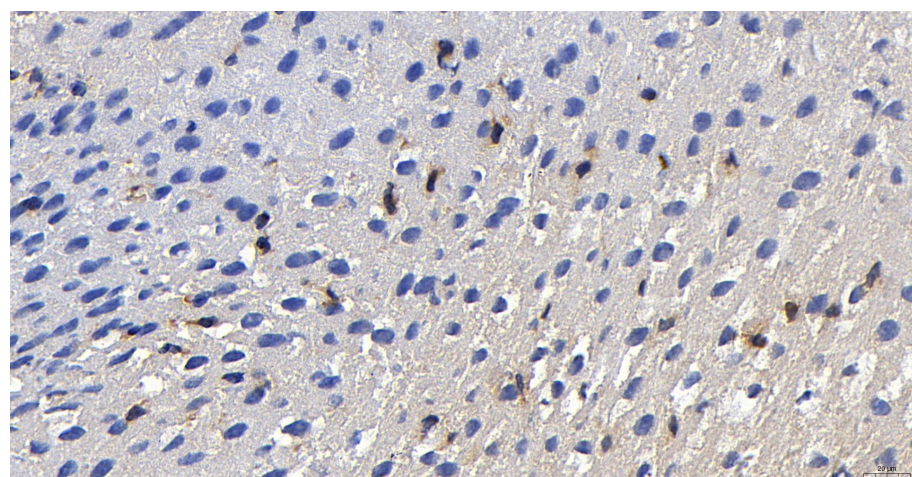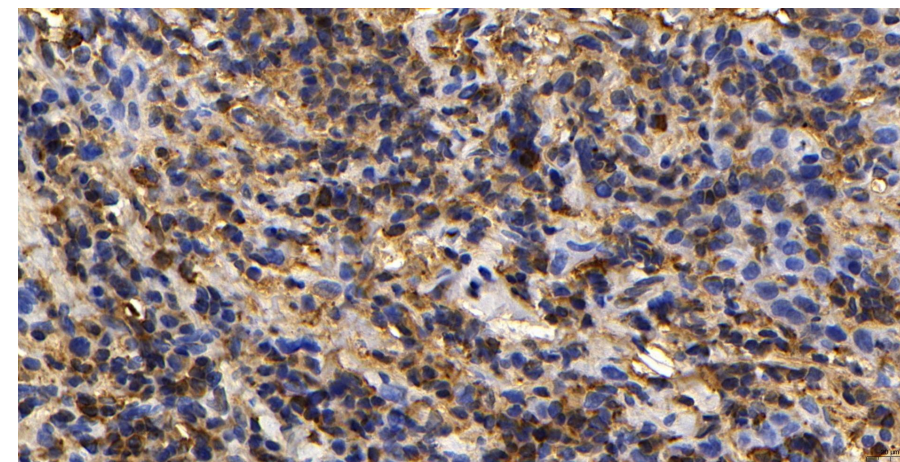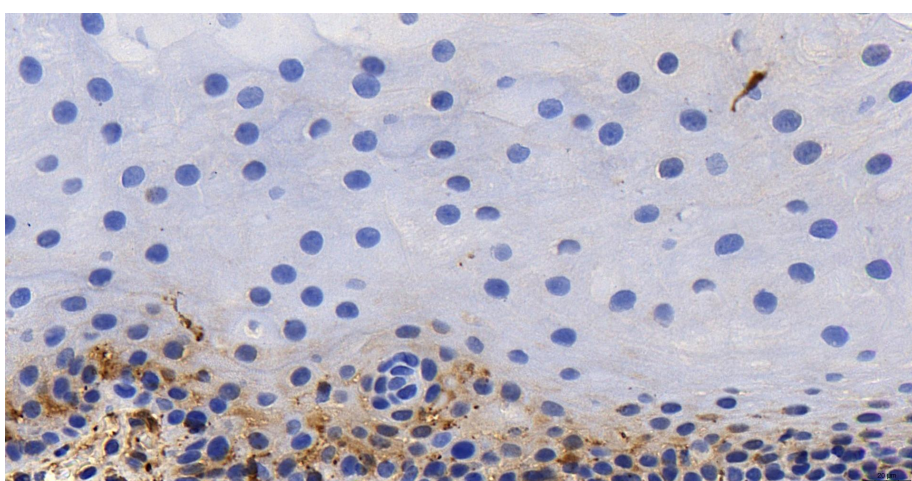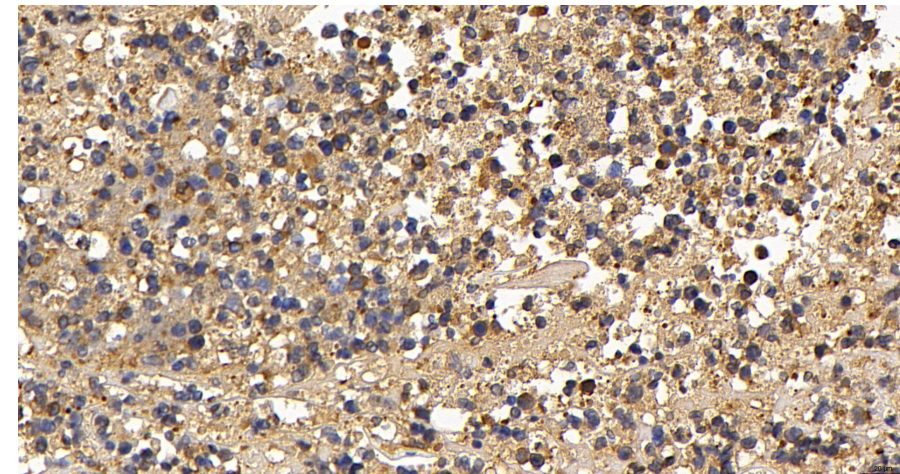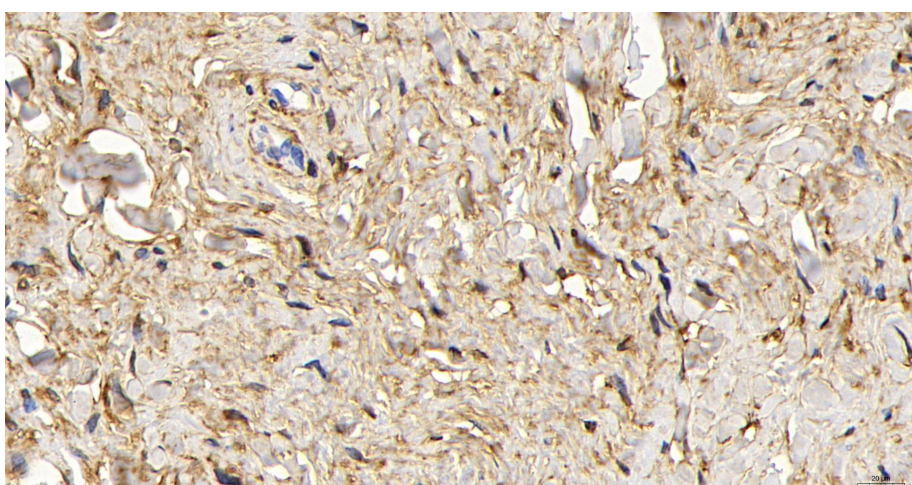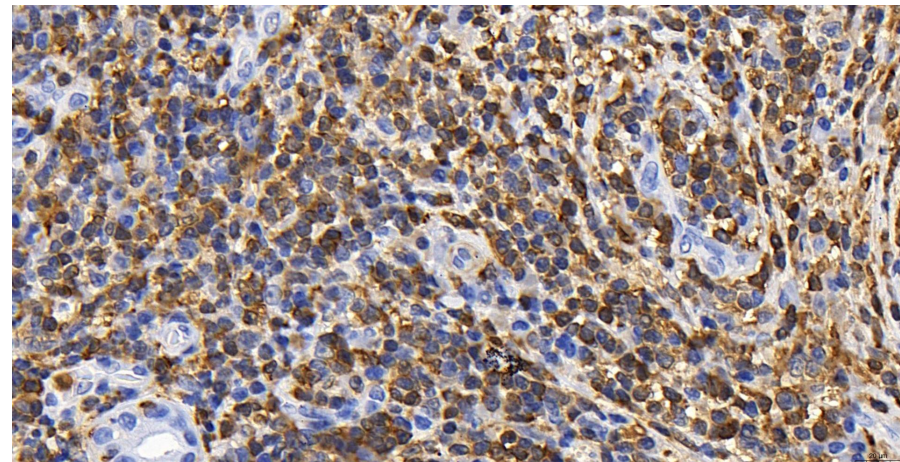

# SERPINA5

## Normal Tissue

## Tumor Tissue

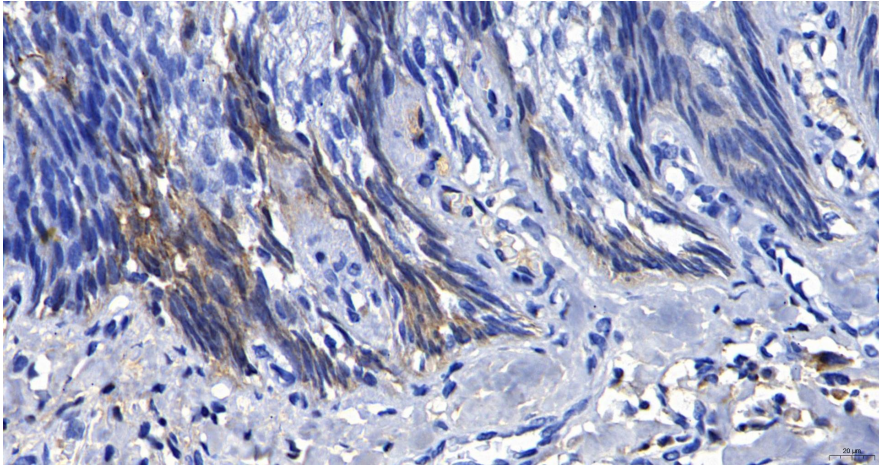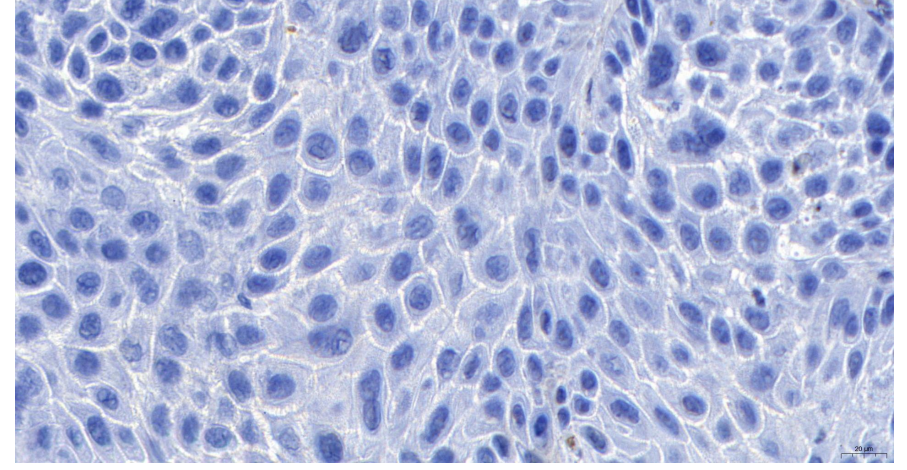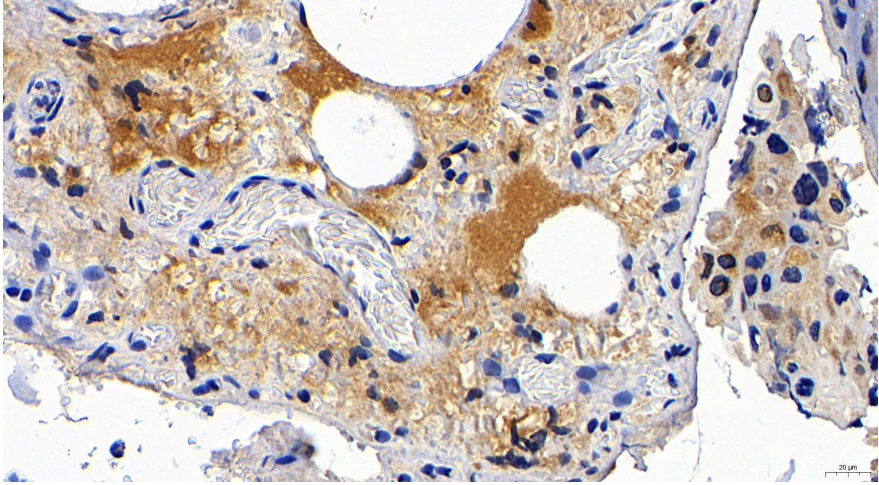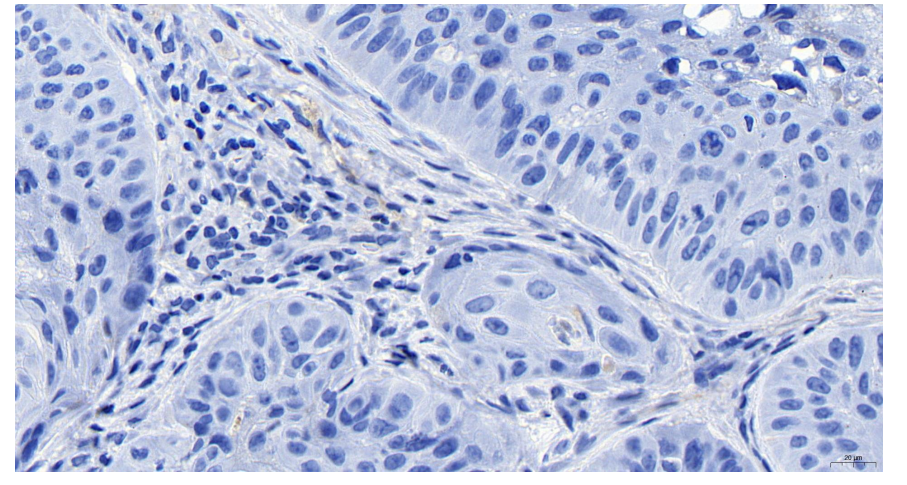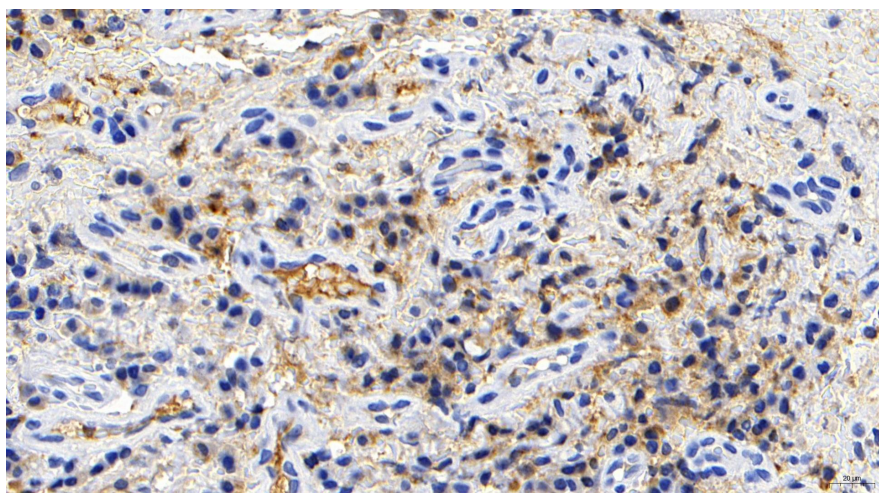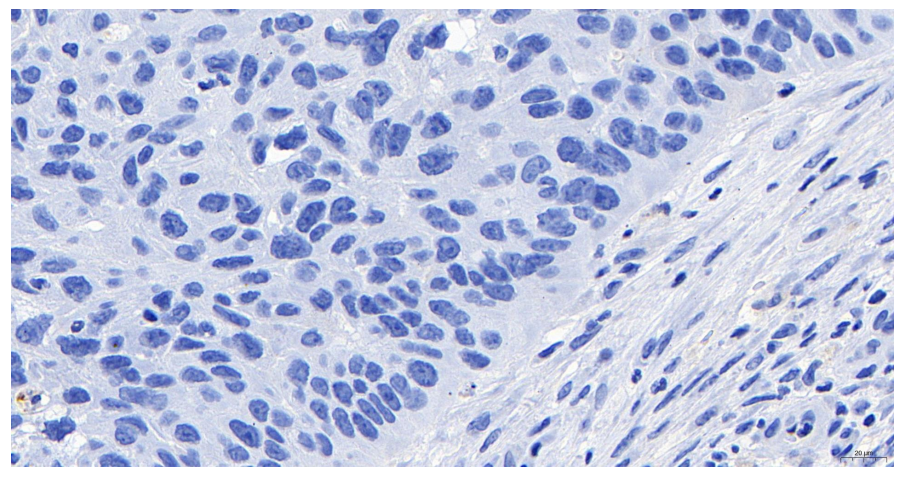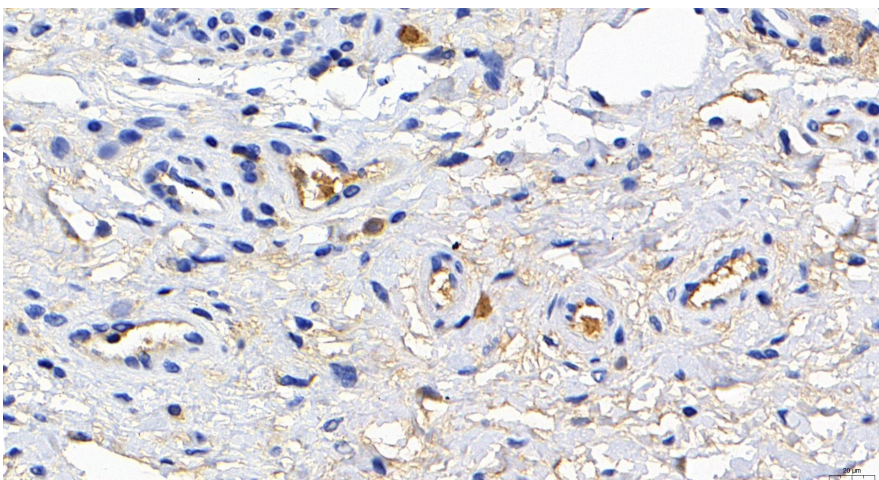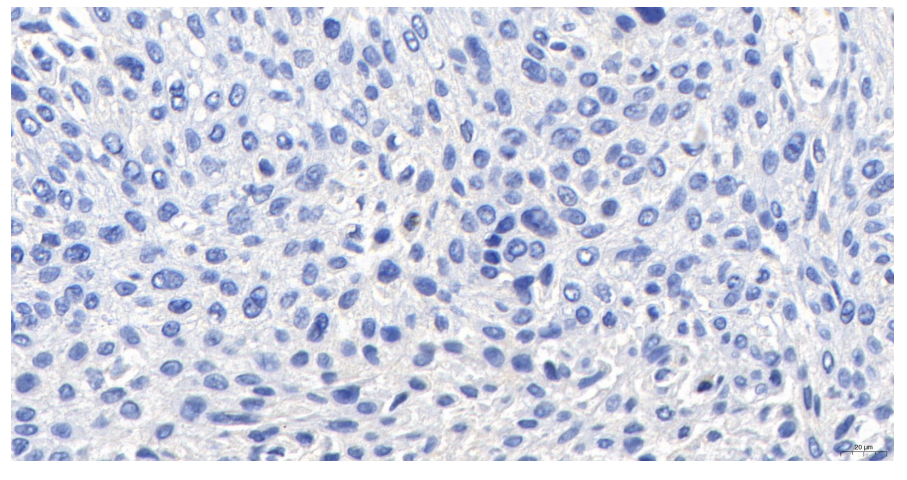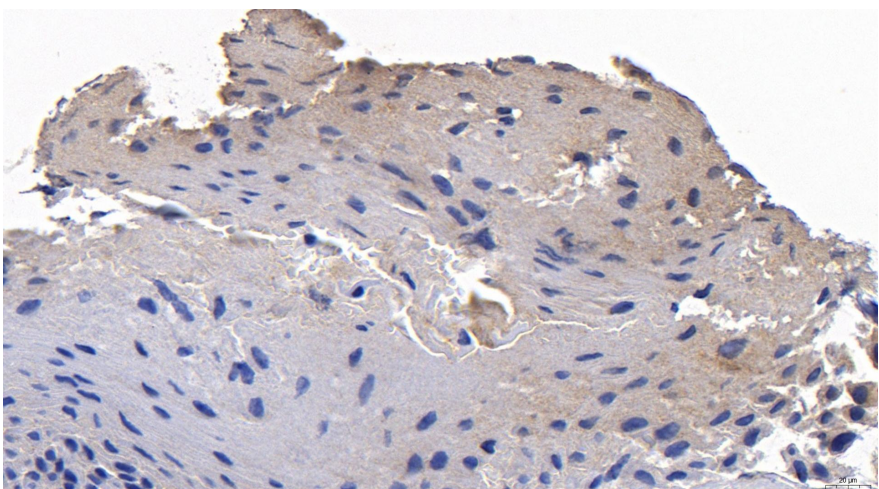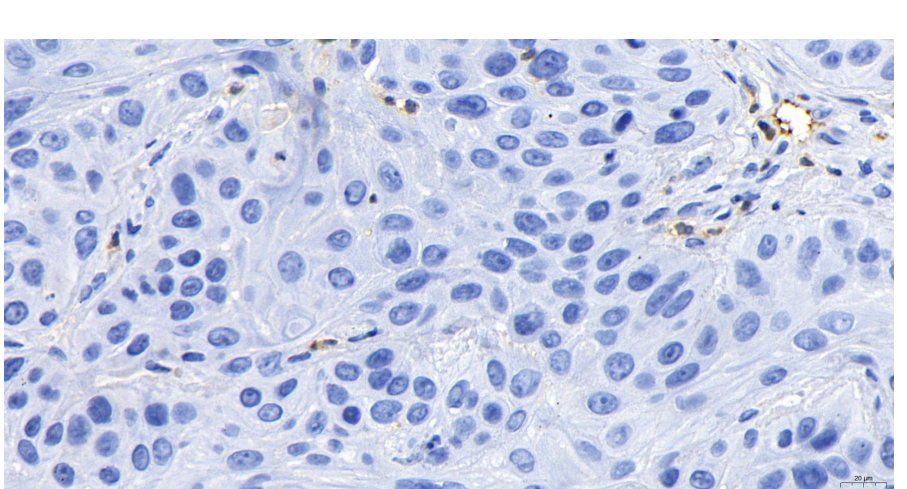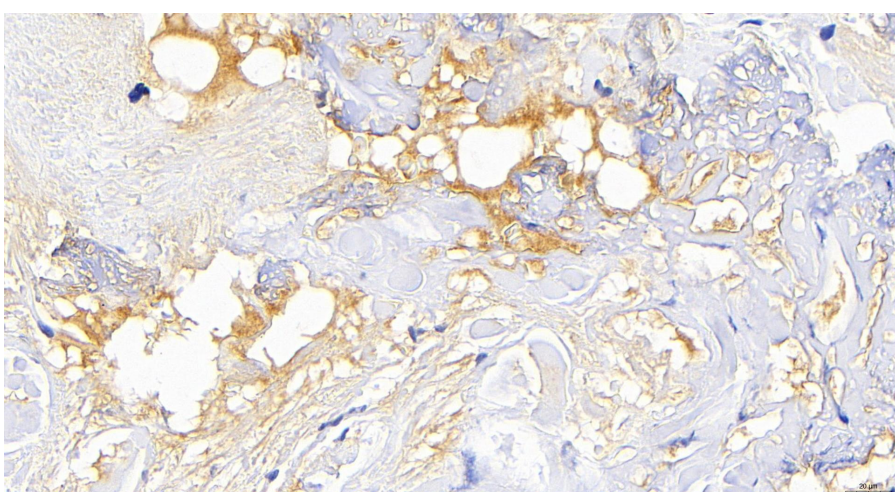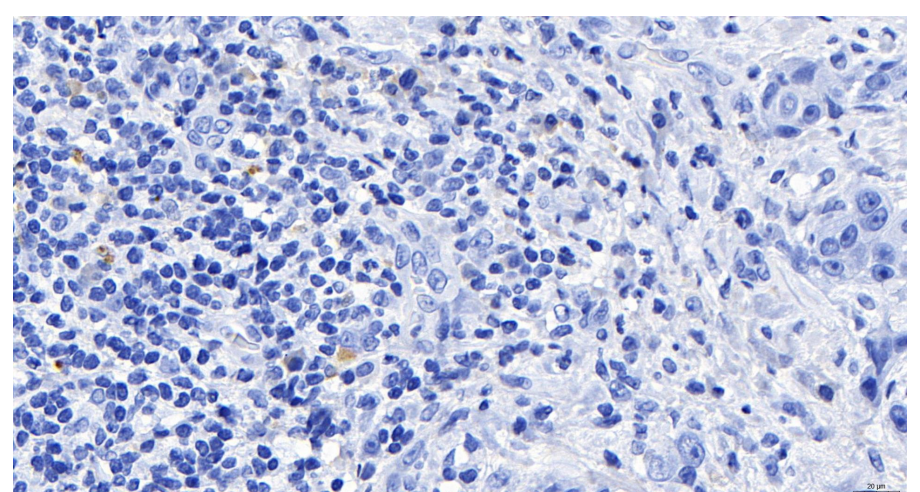

Supplement: 432_2024_5606_MOESM3_ESM.pdf [file 432_2024_5606_MOESM3_ESM.pdf]
