# Supplementary material for: An angiogenesis-associated gene-based signature predicting prognosis and immunotherapy efficacy of head and neck squamous cell carcinoma patients
Source: PubMed Central journal article supplement (PMC10861726; doi:10.1007/s00432-024-05606-8), 2024-02-12

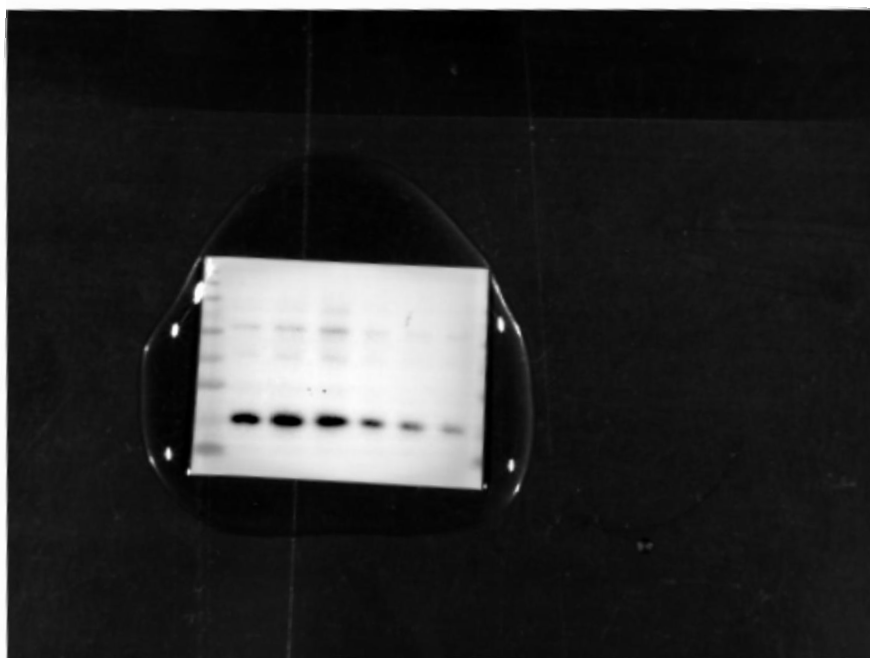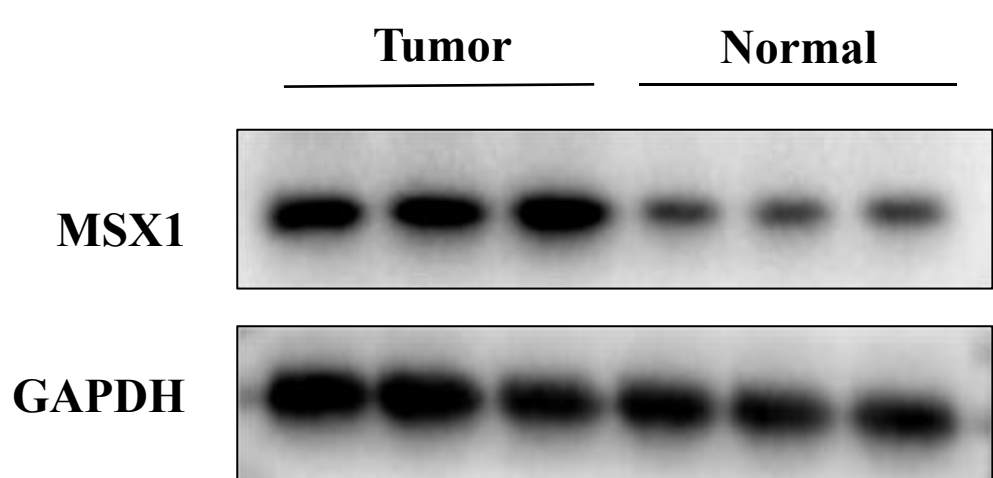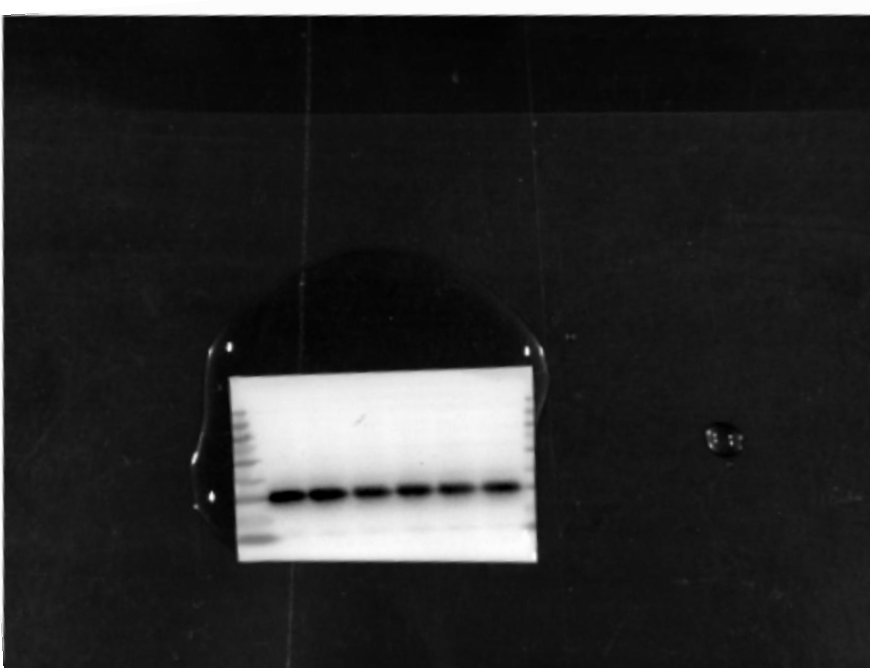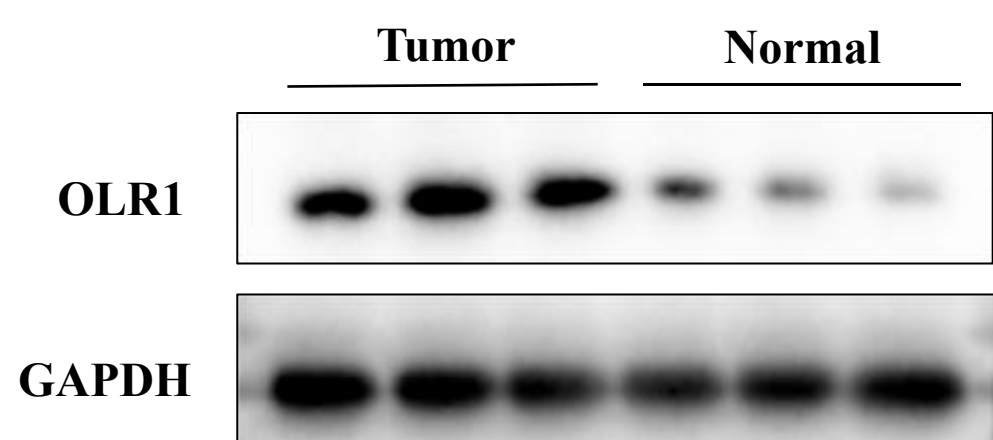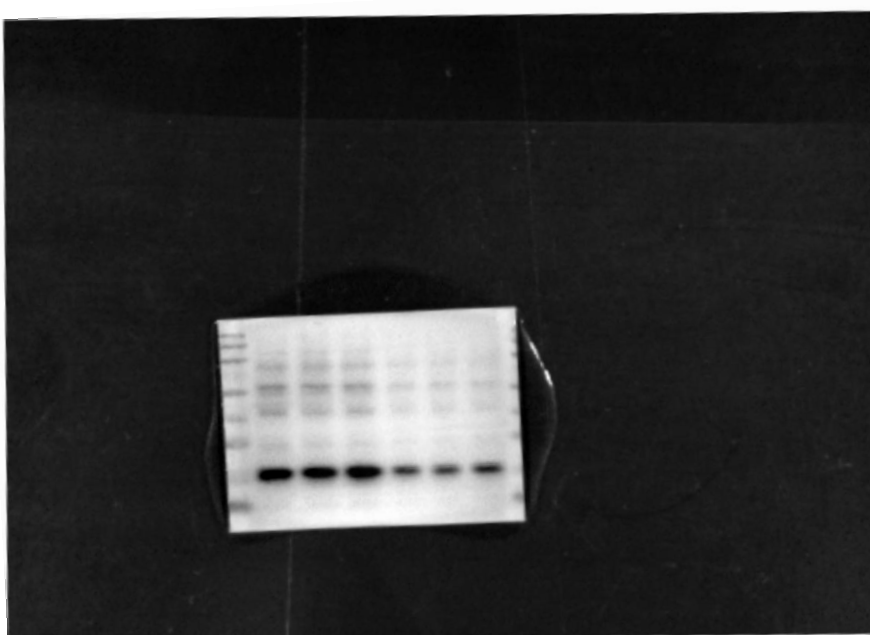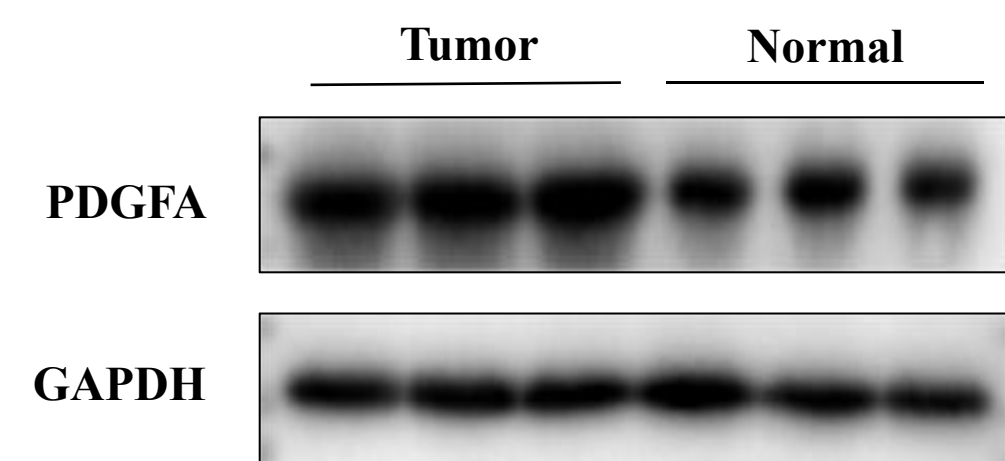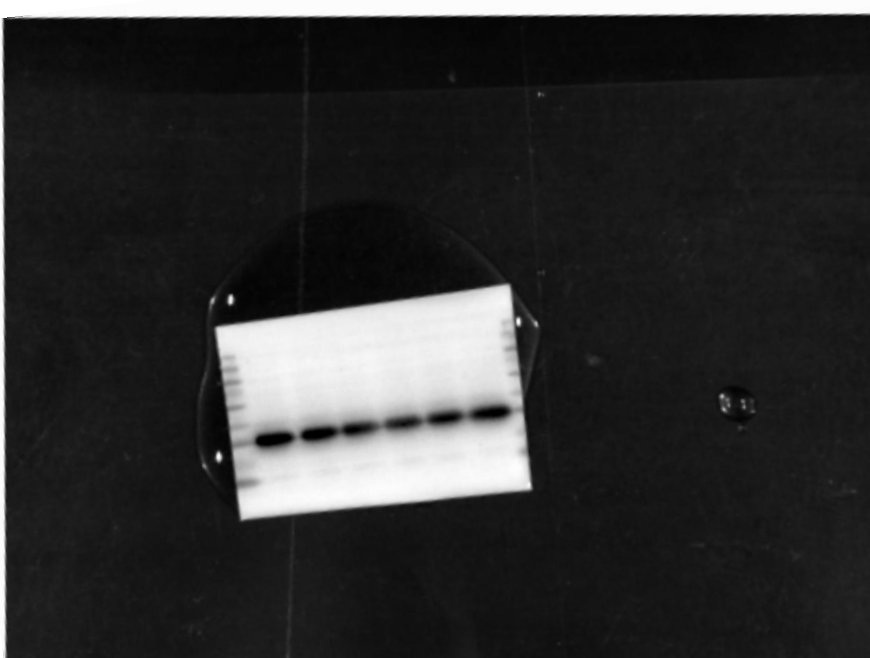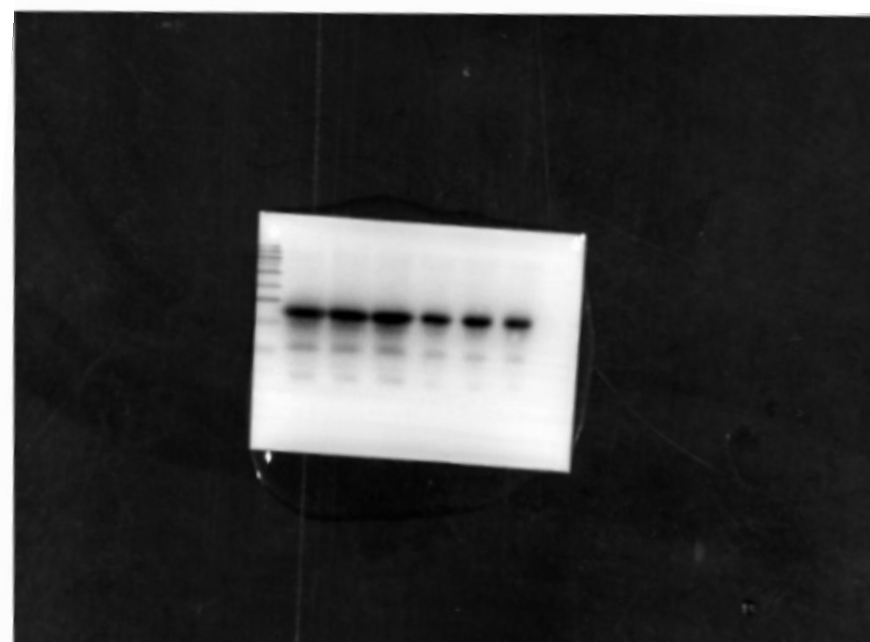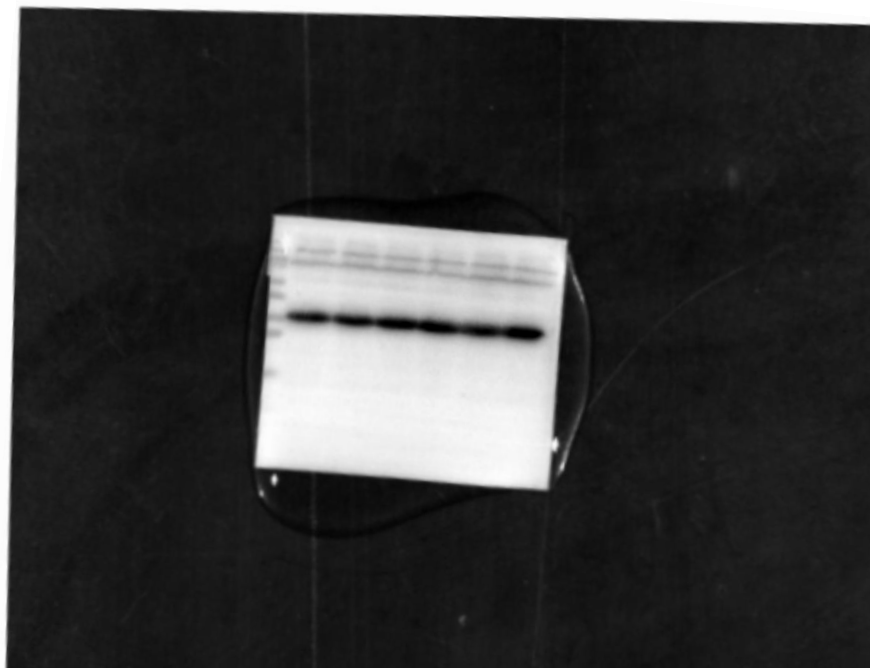

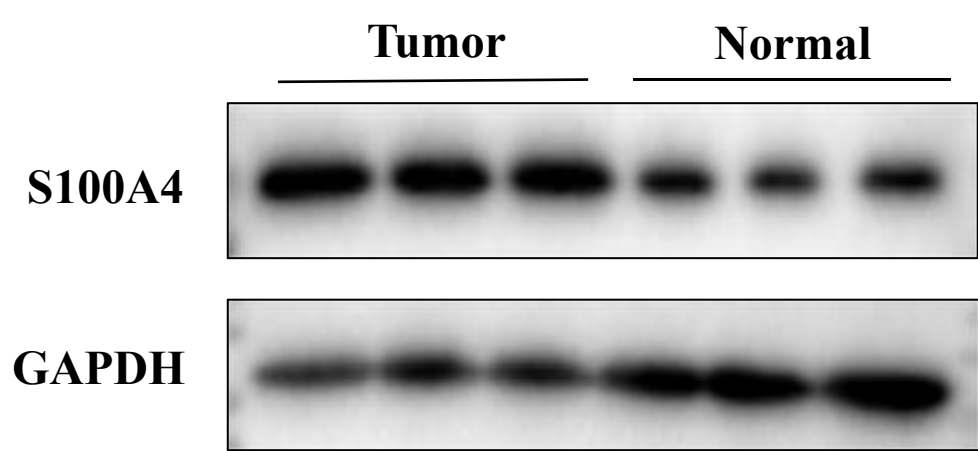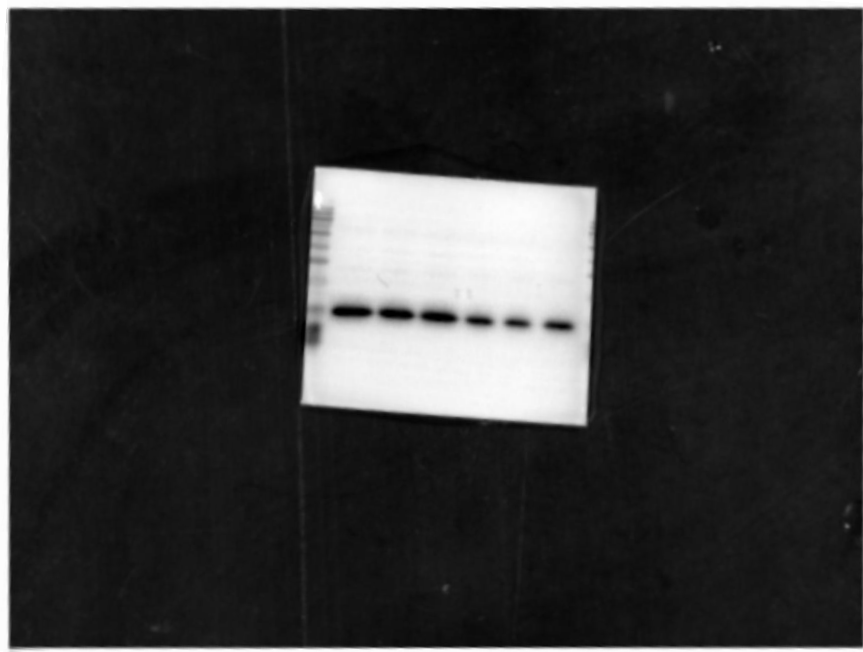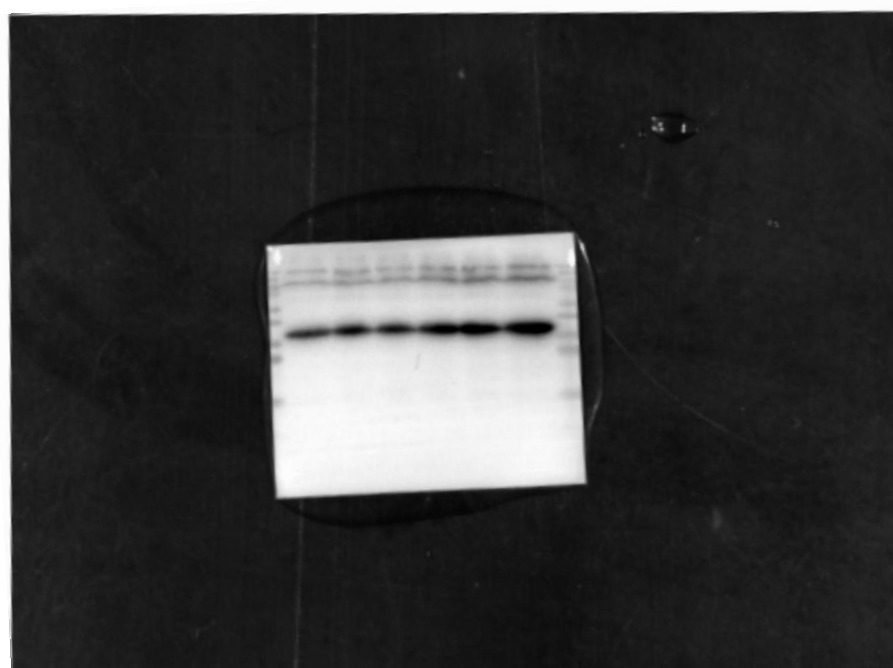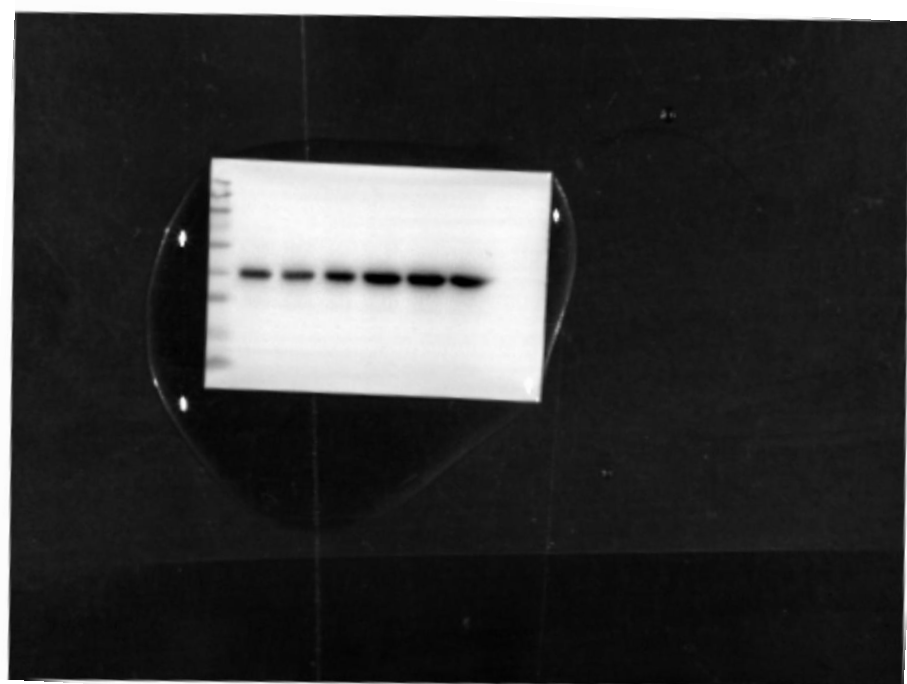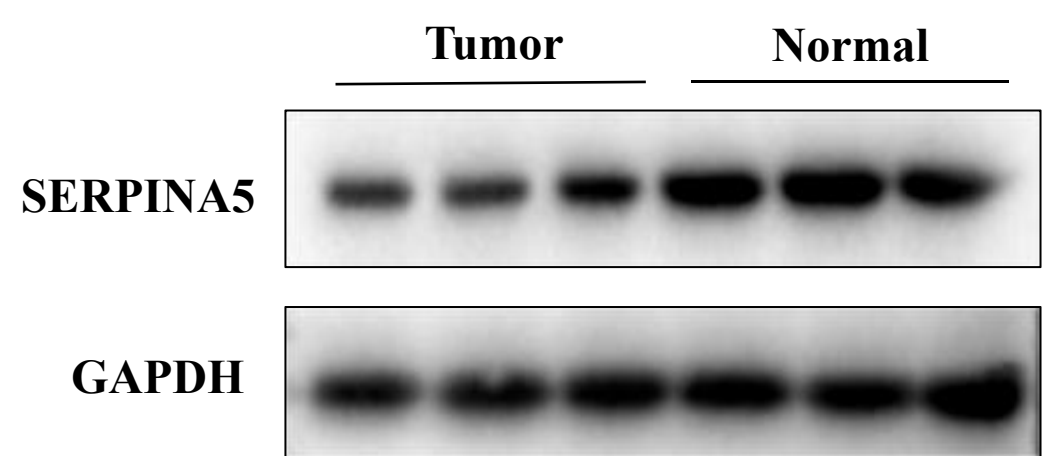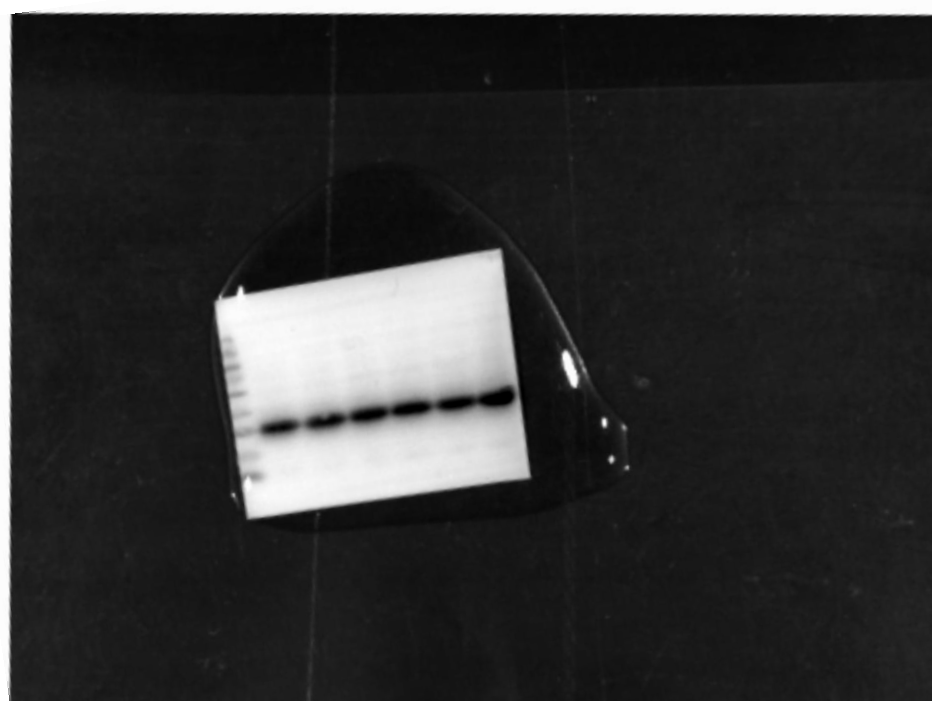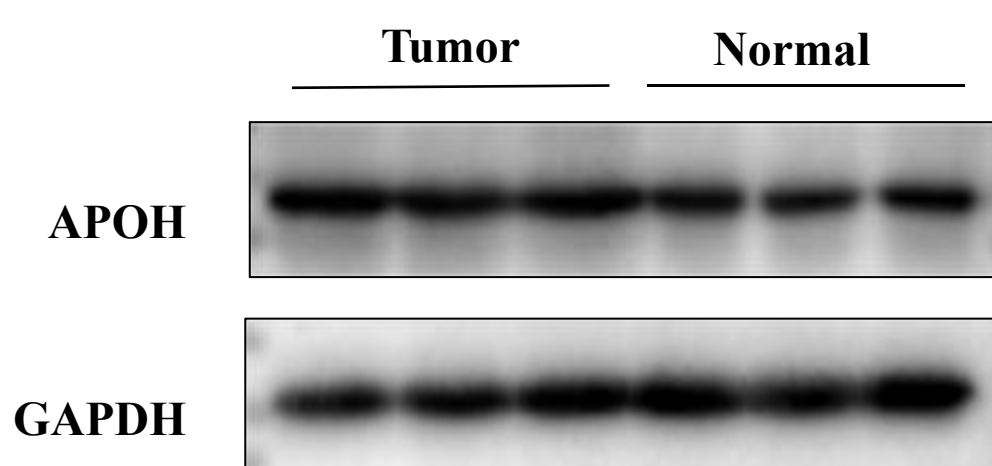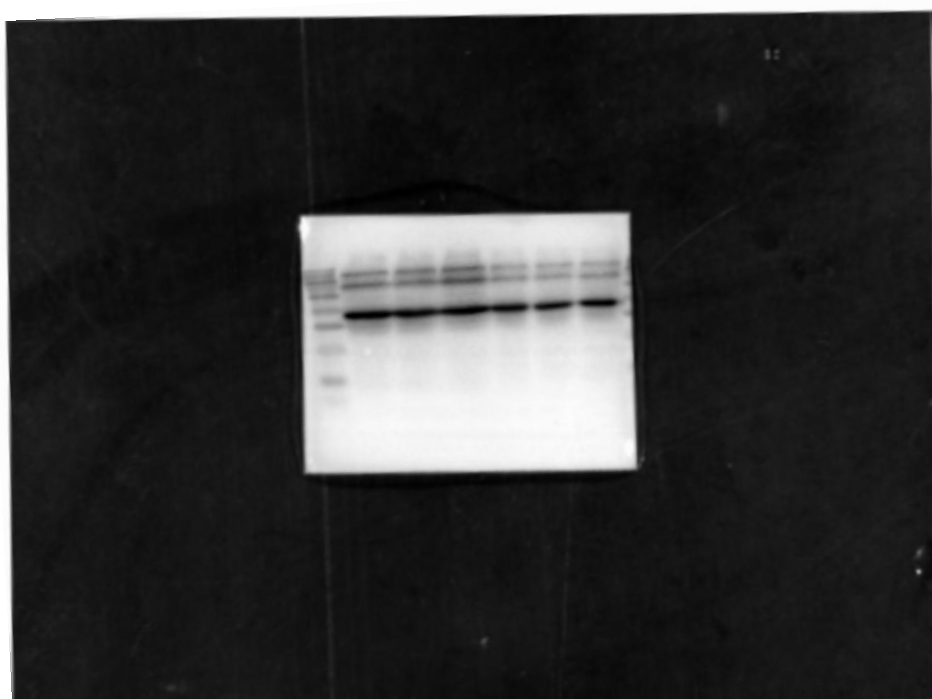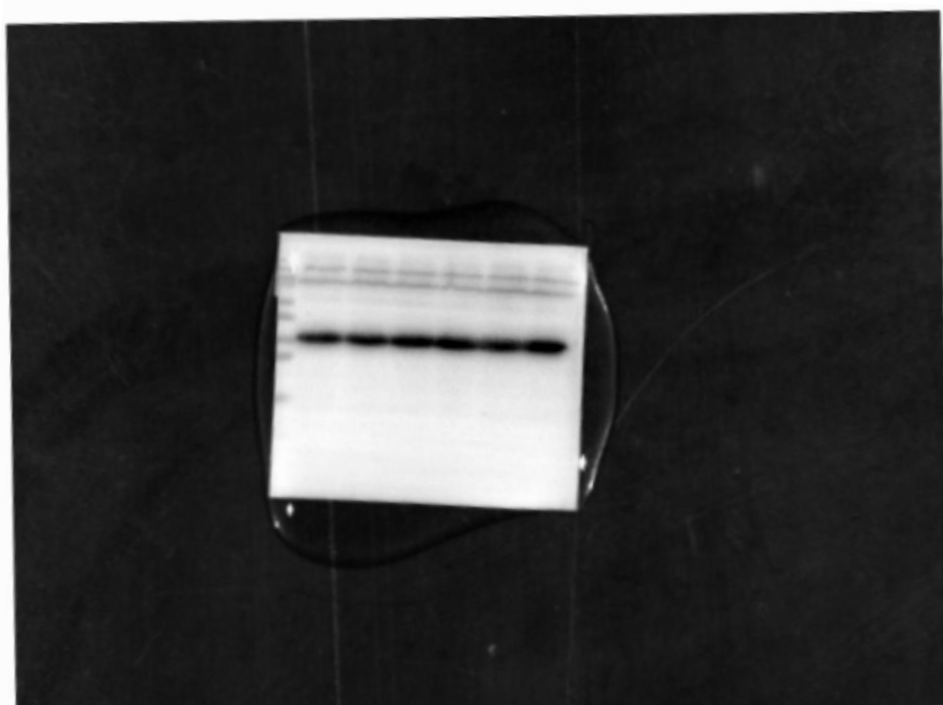

Supplement: 432_2024_5606_MOESM4_ESM.pdf [file 432_2024_5606_MOESM4_ESM.pdf]
